# Supplementary material for: Retrospective review of tertiary and neurosyphilis cases in Alberta, 1973–2017
Source: PubMed Central journal article supplement — BMJ Open. 2019 Jun 22;9(6):e025995. doi: 10.1136/bmjopen-2018-025995 (PMC6596972; doi:10.1136/bmjopen-2018-025995), 2019-06-22
Supplement: bmjopen-2018-025995.draft_revisions.pdf [file bmjopen-2018-025995.draft_revisions.pdf]

# BMJ Open

BMJ Open is committed to open peer review. As part of this commitment we make the peer review history of every article we publish publicly available.

When an article is published we post the peer reviewers' comments and the authors' responses online. We also post the versions of the paper that were used during peer review. These are the versions that the peer review comments apply to.

The versions of the paper that follow are the versions that were submitted during the peer review process. They are not the versions of record or the final published versions. They should not be cited or distributed as the published version of this manuscript.

BMJ Open is an open access journal and the full, final, typeset and author-corrected version of record of the manuscript is available on our site with no access controls, subscription charges or pay-per-view fees (<http://bmjopen.bmj.com>).

If you have any questions on BMJ Open's open peer review process please email [info.bmjopen@bmj.com](mailto:info.bmjopen@bmj.com)

# BMJ Open

## Retrospective Review of Tertiary and Neurosyphilis Cases in Alberta, 1973 to 2017

|                               |                                                                                                                                                                                                                                                                                                                                                                                    |
|-------------------------------|------------------------------------------------------------------------------------------------------------------------------------------------------------------------------------------------------------------------------------------------------------------------------------------------------------------------------------------------------------------------------------|
| Journal:                      | <i>BMJ Open</i>                                                                                                                                                                                                                                                                                                                                                                    |
| Manuscript ID                 | bmjopen-2018-025995                                                                                                                                                                                                                                                                                                                                                                |
| Article Type:                 | Research                                                                                                                                                                                                                                                                                                                                                                           |
| Date Submitted by the Author: | 15-Aug-2018                                                                                                                                                                                                                                                                                                                                                                        |
| Complete List of Authors:     | Landry, Takaaki; University of Alberta<br>Smyczek, Petra; University of Alberta, Medicine/Infectious Diseases;<br>Alberta Health Services<br>Cooper, Ryan; University of Alberta<br>Gratrix, Jennifer<br>Bertholet, Lindsay; Alberta Health Services<br>Read, Ron<br>Romanowski, Barbara; University of Alberta<br>Singh , AE; University of Alberta, Medicine/Infectious Diseases |
| Keywords:                     | Neurology < INTERNAL MEDICINE, SEXUAL MEDICINE, GENITOURINARY MEDICINE                                                                                                                                                                                                                                                                                                             |
|                               |                                                                                                                                                                                                                                                                                                                                                                                    |

SCHOLARONE™  
Manuscripts

## Retrospective Review of Tertiary and Neurosyphilis Cases in Alberta, 1973 to 2017

### Authors and Affiliations:

Takaaki Landry BSc<sup>1</sup>; Petra Smyczek MD<sup>1,2,3</sup>; Ryan Cooper MD<sup>1</sup>; Jennifer Gratrix MSc<sup>2</sup>; Lindsay Bertholet MN<sup>2</sup>; Ron Read MD PhD<sup>4</sup>; Barbara Romanowski MD<sup>1,3</sup>; Ameeta E. Singh BMBS MSc<sup>1,3</sup>

<sup>1</sup>University of Alberta, Edmonton, Canada; <sup>2</sup>Provincial STI Services, Alberta Health Services, Edmonton, Canada; <sup>3</sup>Edmonton STI Clinic, Alberta Health Services, Edmonton, Canada;

<sup>4</sup>University of Calgary, Calgary, Alberta, Canada

**Key Words:** Syphilis, neurosyphilis, epidemiology, tertiary syphilis

**Funding Statement:** TL received funding as a post secondary summer student from Alberta Health Services.

**Competing Interests:** The authors declare no competing interests.

**Data Sharing Statement:** No additional data available

1  
2  
3 **Corresponding Author:**  
4

5 Dr. Ameeta Singh, BMBS (UK), MSc, FRCPC  
6

7  
8 Alberta Health Services – Edmonton STI Clinic  
9

10  
11 3B20-11111 Jasper Ave  
12

13  
14 Edmonton, AB. T5K0L4  
15

16  
17 Email : ameeta@ualberta.ca  
18

19  
20 Phone : 780 342 2300 Fax : 780 425 2194  
21  
22  
23  
24  
25

26 **Word Count:** Abstract:254; Manuscript:2909; Tables: 2; Figures: 3; References: 32  
27  
28  
29  
30  
31  
32  
33  
34  
35  
36  
37  
38  
39  
40  
41  
42  
43  
44  
45  
46  
47  
48  
49  
50  
51  
52  
53  
54  
55  
56  
57  
58  
59  
60

## Abstract

**Objectives:** To review the prevalence and characteristics of tertiary and neurosyphilis cases in Alberta, Canada in the post-antibiotic era.

**Methods:** A retrospective review of all neurosyphilis and tertiary syphilis cases reported in Alberta from 1973 to March 2017 was undertaken and cases classified into early neurosyphilis, late neurosyphilis and cardiovascular syphilis. Variables collected included demographics, sexual partners, HIV status, clinical parameters, symptoms and treatment. Data was analyzed using IBM SPSS Statistics Version 19.0.

**Results:** 254 cases were identified; 251 were neurosyphilis and 3 were cardiovascular. No cases of gummatous syphilis were reported. Early neurosyphilis accounted for 52.4% (n=133) and 46.1% (n=117) were late neurosyphilis cases; one (0.4%) case with unknown duration. Three outbreaks of infectious syphilis were identified during the study period and a concurrent rise in both early and late neurosyphilis was observed during the outbreak periods. The most common manifestation of symptomatic neurosyphilis was ocular involvement which was more likely in early neurosyphilis. Early neurosyphilis cases were more likely to be younger, Caucasian, born in Canada, HIV positive and reporting same sex partners while late neurosyphilis cases were more likely to be older, born outside of Canada and less likely to report same sex partners.

**Conclusions:** Our review of tertiary and neurosyphilis cases found that early and late neurosyphilis cases continue to occur in the context of cycling syphilis outbreaks.

Cardiovascular syphilis cases were extremely rare. Ongoing identification of new cases of

1  
2  
3 syphilis and clinical evaluation of cases for complications continues to be important in the  
4  
5 context of global resurgence of syphilis.  
6  
7  
8  
9  
10  
11  
12

13 **Keywords:** tertiary syphilis, neurosyphilis, Canada  
14  
15

16  
17  
18 **Strengths and Limitations of this study:**  
19

- 20 • An important strength of our study was the consistent reporting of all cases with positive  
21 syphilis serology over the 44 year period by laboratories as well as active follow up of all cases  
22 by the provincial STI program.  
23  
24
- 25 • Another strength of our study is the retrospective application of current case definitions to all  
26 cases by 2 experienced STI clinicians.  
27  
28
- 29 • One of the limitations to the retrospective review of data is the possibility of inaccurate  
30 classification of cases due to insufficient available information.  
31  
32
- 33 • Additional study limitations include changes in data collection practices over time.  
34  
35
- 36 • Routine testing for HIV in cases of syphilis was also not conducted in earlier years and as such  
37 the number of concurrent HIV infections may have been underestimated.  
38  
39  
40  
41  
42  
43  
44  
45  
46  
47  
48  
49  
50  
51  
52  
53  
54  
55  
56  
57  
58  
59  
60

## Manuscript

### Background

Syphilis, caused by *Treponema pallidum* subspecies *pallidum*, passes through a series of stages, including primary, secondary, latent and tertiary syphilis if left untreated.<sup>1</sup> Based on data from the pre-antibiotic era, about a third of persons with untreated latent syphilis will develop late neurosyphilis, cardiovascular syphilis or gummatous syphilis.<sup>2</sup> Gummatous syphilis is characterized by the development of indolent granulomatous lesions<sup>3</sup> which typically affect the skin, liver, and bone but can also involve other parts of the body.<sup>4</sup> Syphilitic aortitis is the most common manifestation of cardiovascular syphilis and typically involves the ascending aorta.<sup>4-6</sup>

Neurosyphilis can occur at any stage of syphilis.<sup>1,7</sup> It is classified into early and late forms.<sup>1</sup> Early neurosyphilis affects the cerebrospinal fluid (CSF), cerebral blood vessels, and meninges more often than the brain or spinal cord parenchyma. Typically, manifestations occur within weeks to a few years after primary infection and may occur at the same time as primary or secondary syphilis, or may be asymptomatic. Manifestations may include meningitis with or without cranial nerve involvement, meningovascular disease or stroke. Late neurosyphilis can remain asymptomatic or progress to meningovascular syphilis, tabes dorsalis, or general paresis. Late neurosyphilis is extremely rare in the antibiotic era and usually occurs years to decades after primary infection.<sup>1,8</sup> HIV infection may affect the natural course of disease as atypical presentations and rapid progression of syphilis in HIV positive individuals has been reported.<sup>9-13</sup>

1  
2  
3 In the pre-antibiotic era, an estimated one third of untreated persons developed tertiary  
4 syphilis<sup>14</sup> with about 15% progressing to gummatous disease (1-46 years post-infection), 10% to  
5 cardiovascular syphilis (20-30 years after infection), and 4-14% to late neurosyphilis (2-50 years  
6 after infection).<sup>1</sup> After the introduction of penicillin in the 1940s, the number of cases of syphilis  
7 plummeted in the United States, reaching a nadir in 2000.<sup>1</sup> Nowadays, tertiary syphilis is a rare  
8 disease due to easy and effective treatment of infectious and latent syphilis. Antibiotic use for  
9 other infections is also likely a factor.  
10  
11  
12  
13  
14  
15  
16  
17  
18  
19  
20  
21  
22

23 In Canada, syphilis (all stages) has been nationally notifiable since 1924. However national  
24 reports only include data on infectious syphilis, since only these cases are of major public health  
25 significance.<sup>15</sup> In Alberta, all cases of syphilis, including tertiary and neuro-syphilis have been  
26 notifiable to a centralized program under the Public Health Act since 1921. Syphilis rates have  
27 fluctuated over the last fifty years with a rise in rates during outbreak periods. Since 2000, rates  
28 of infectious syphilis have increased dramatically in Alberta (0.6/100,000 population in 2000 to  
29 12.5/100,000 population in 2017), with the most recent resurgence among men who have sex  
30 with men (MSM) and up to 30% of patients co-infected with HIV (personal communication  
31 Jennifer Gratrix, Provincial STI Services, Alberta Health Services).<sup>16</sup>  
32  
33  
34  
35  
36  
37  
38  
39  
40  
41  
42  
43  
44  
45  
46

47 There are few data on the prevalence and characteristics of tertiary and neuro-syphilis cases in  
48 the post antibiotic era. We are aware of only one study from the Netherlands which estimated  
49 that 10-13% of all syphilis cases from 1999-2010 had neurosyphilis; these data were limited by  
50 the fact that the diagnostic criteria used for neurosyphilis was based on hospital discharge  
51  
52  
53  
54  
55  
56  
57  
58  
59  
60



1  
2  
3 diagnosis rather than clinical examination or laboratory criteria.<sup>17</sup> We sought to determine the  
4 prevalence and characteristics of reported cases of tertiary and neurosyphilis in Alberta from  
5  
6 1973 onwards.  
7  
8  
9

## 10 11 12 13 **Methods**

14  
15 A retrospective review was conducted of all tertiary and neurosyphilis cases in Alberta (current  
16 population 4.3 million) from 1973 to March 2017. All cases of syphilis are reportable by  
17  
18 laboratories and clinicians to Provincial STI Services under the Alberta Public Health Act. Cases  
19  
20 were classified as defined in Table 1.<sup>18</sup>  
21  
22  
23  
24  
25  
26  
27

28 Table 1: Case Definitions Used for Diagnosis of Neurosyphilis and Tertiary Syphilis (Adapted  
29  
30 from<sup>19</sup>;  
31

| Syphilis stage                                                              | Definition                                                                                                                                                                                                                                                     |
|-----------------------------------------------------------------------------|----------------------------------------------------------------------------------------------------------------------------------------------------------------------------------------------------------------------------------------------------------------|
| Tertiary syphilis                                                           | Reactive treponemal serology together with characteristic late abnormalities of the cardiovascular system, bone, skin or other structures, in the absence of other known causes of these abnormalities and no clinical or laboratory evidence of neurosyphilis |
| Early Neurosyphilis<br>(< 1 year after<br>infection)<br><i>Asymptomatic</i> | Laboratory confirmation of primary, second or early latent syphilis and<br><br>i) reactive CSF-VDRL in non-bloody CSF<br><br>AND/OR<br><br>ii) elevated CSF leukocytes (>5/micro) and/or elevated CSF                                                          |

|                                                                                           |                                                                                                                                                                                                                                                                                                                                                                   |
|-------------------------------------------------------------------------------------------|-------------------------------------------------------------------------------------------------------------------------------------------------------------------------------------------------------------------------------------------------------------------------------------------------------------------------------------------------------------------|
|                                                                                           | <p>protein (&gt;45 mg/dL) in the absence of other known causes</p> <p>AND</p> <p>NO signs or symptoms of neurosyphilis</p>                                                                                                                                                                                                                                        |
| <p>Early Neurosyphilis</p> <p>(&lt; 1 year after infection)</p> <p><i>Symptomatic</i></p> | <p>Laboratory confirmation of primary, second or early latent syphilis and</p> <p>i) reactive CSF-VDRL in non-bloody CSF</p> <p>AND/OR</p> <p>ii) elevated CSF leukocytes (&gt;5/micro) and/or elevated CSF protein (&gt;45 mg/dL) in the absence of other known causes</p> <p>AND</p> <p>clinical signs or symptoms of neurosyphilis*</p>                        |
| <p>Late neurosyphilis</p> <p>(&gt;1 year after infection)</p> <p><i>Asymptomatic</i></p>  | <p>Reactive treponemal serology (not staged as primary, secondary or early latent syphilis) and</p> <p>i) reactive CSF-VDRL in non-bloody CSF</p> <p>AND/OR</p> <p>ii) elevated CSF leukocytes (&gt;5/micro) and/or elevated CSF protein (&gt;45 mg/dL) in the absence of other known causes</p> <p>AND</p> <p>NO clinical signs or symptoms of neurosyphilis</p> |
| Late neurosyphilis                                                                        | Reactive treponemal serology (not staged as primary, secondary or early                                                                                                                                                                                                                                                                                           |

|                                                        |                                                                                                                                                                                                                                                                          |
|--------------------------------------------------------|--------------------------------------------------------------------------------------------------------------------------------------------------------------------------------------------------------------------------------------------------------------------------|
| (>1 year after<br>infection)<br><br><i>Symptomatic</i> | latent syphilis) and<br><br>iii) reactive CSF-VDRL in non-bloody CSF<br><br>AND/OR<br><br>iv) elevated CSF leukocytes (>5/micro) and/or elevated CSF<br>protein (>45 mg/dL) in the absence of other known causes<br><br>AND clinical signs or symptoms of neurosyphilis* |
|--------------------------------------------------------|--------------------------------------------------------------------------------------------------------------------------------------------------------------------------------------------------------------------------------------------------------------------------|

\*if ocular or otic signs or symptoms present with a normal CSF examination, patient was classified as symptomatic neurosyphilis (early or late)

Serological testing for syphilis changed during the study period, with reverse sequence syphilis screening (RSSS) using an enzyme immunoassay being introduced in September 2017; prior to this a quantitative Rapid Plasma Reagin (RPR) was used. Since the criteria for classifying neurosyphilis evolved over time, all neurosyphilis cases during the study period were reviewed by two STI physicians and classified into early asymptomatic, early symptomatic, late asymptomatic, late symptomatic neurosyphilis cases; disagreement between the classifications of cases was resolved by consensus between the two physicians (PS and AES).

Reported rates of other stages of syphilis prior to 2000 were obtained from historical surveillance reports from Alberta STI Services. Population denominators were obtained through government population estimates.<sup>19</sup>

1  
2  
3  
4  
5  
6 Variables collected for analysis included demographics, sexual partners, HIV status (testing  
7  
8 available since 1985<sup>20</sup> and recommended for all syphilis cases once serology available),  
9  
10 diagnosis date, clinical parameters, symptoms, and treatment. Variables for cases diagnosed  
11  
12 prior to 2004 were captured through chart review, while variables for cases diagnosed after  
13  
14 2004 were extracted from the provincial STI surveillance system. Client reported symptoms  
15  
16 were broken into six categories (not mutually exclusive) based on system involvement: ocular  
17  
18 (e.g. uveitis, retinal, vision loss), auditory (e.g. hearing loss, tinnitus), stroke, peripheral  
19  
20 neuropathy (e.g. impaired gait, numbness), central nervous system (e.g. aphasia, ataxia), and  
21  
22 cognitive impairment (e.g. dementia, psychosis).  
23  
24  
25  
26  
27  
28  
29

30 Treatment data was divided into 3 mutually exclusive categories based on the following  
31  
32 minimum treatments: 1) penicillin G 3-4 million units IV q 4 h (18-24 million units/day) for 10 -  
33  
34 14 days, 2) ceftriaxone 2 g IV/IM daily x 10-14 days, 3) Other, which included drugs like  
35  
36 chloramphenicol, doxycycline, tetracycline, benzathine penicillin G- long acting, reduced doses  
37  
38 of penicillin G or ceftriaxone.  
39  
40  
41  
42  
43  
44

45 Analysis was stratified by stage of syphilis to compare early and late neurosyphilis by the  
46  
47 previously listed variables using Chi-square or Fisher's exact for categorical variables and Mann-  
48  
49 Whitney tests for continuous variables. Missing data was categorized as unknown and included  
50  
51 in the analysis. As well, each syphilis stage was stratified by asymptomatic and symptomatic for  
52  
53 comparison. Associations over time (collection decade) were analyzed using linear association.  
54  
55  
56  
57  
58  
59  
60

1  
2  
3 Significant changes in rates over time were assessed using a linear trend model. The  
4  
5 significance was set at  $p$ -value of  $<0.05$ . Data was analyzed using IBM SPSS Statistics version  
6  
7 19.0 (IBM, Armonk, NY, USA). This study was approved by the University of Alberta Health  
8  
9 Research Ethics Board (Approval Number: Pro00075972).  
10  
11  
12  
13  
14

### 15 ***Patient and Public Involvement***

16  
17 Patients were not involved in the design of this research study.  
18  
19  
20  
21  
22

### 23 **Results**

24  
25 A total of 254 cases were identified during the study period, of which 251 were neurosyphilis  
26  
27 and 3 were cardiovascular (CV) cases; one case of CV syphilis was reported in each of the  
28  
29 following years: 1976, 1979, and 1984. No cases of gummatous syphilis were reported during  
30  
31 this time period. The neurosyphilis cases were evenly divided as early (52.4%;  $n=133$ ) and late  
32  
33 (46.1%;  $n=117$ ), with one additional case of unknown duration. Three individuals were  
34  
35 diagnosed with two distinct episodes of neurosyphilis over the course of the reporting period.  
36  
37 All three of these individuals were men who reported same sex partners, all six episodes were  
38  
39 diagnosed between 2005 and 2014, and all categorized as early neurosyphilis. Two of these  
40  
41 men were co-infected with HIV.  
42  
43  
44  
45  
46  
47  
48  
49

50 Between 1975 and 2016, 8,874 total cases of syphilis were reported in Alberta. Of these, 4513  
51  
52 (51%) were infectious (i.e. staged as primary, secondary, early latent) and 4361 (49%) were  
53  
54 classified as non-infectious (i.e. late latent, tertiary). Over the time period, three outbreaks of  
55  
56  
57  
58  
59  
60

1  
2  
3 infectious syphilis were identified (Figure 1). The first outbreak (defined as an increase in cases  
4  
5 of two standard deviations above the baseline) occurred between 1981 and 1987, the second  
6  
7 outbreak commenced in 2000 and declined in 2011, and a third outbreak began in 2015 and  
8  
9 continues. Of the infectious syphilis cases, 2.8% (n=128) were staged as early neurosyphilis.  
10  
11 When plotting the rate of early neurosyphilis cases against infectious syphilis cases, significant  
12  
13 rises were seen during the outbreak periods (outbreak #2,  $p < 0.001$ ; Figure 2). Of the  
14  
15 noninfectious syphilis cases staged during this time, 2.6% (115/4316) were staged with late  
16  
17 neurosyphilis. When plotting the rate of late neurosyphilis against infectious syphilis during the  
18  
19 outbreak periods, a significant rise in late neurosyphilis cases was also noted toward the end of  
20  
21 the outbreak periods (outbreak #1,  $p = 0.04$ , outbreak #2,  $p = 0.02$ ).  
22  
23  
24  
25  
26  
27  
28  
29

30 Early neurosyphilis cases were significantly younger, more likely to be Caucasian, born in  
31  
32 Canada, diagnosed in recent decades (2010's), reported same sex partners, and HIV positive as  
33  
34 compared to late neurosyphilis cases (Table 2).  
35  
36  
37  
38  
39

40 Table 2: Characteristics of Early and Late Neurosyphilis (Alberta, 1973 to March 2017; n=250)  
41

|  | Early Neurosyphilis    |                        |                  |         | Late Neurosyphilis     |                       |                  |         | Comparison of<br>Early<br>and<br>Late p-<br>Value |
|--|------------------------|------------------------|------------------|---------|------------------------|-----------------------|------------------|---------|---------------------------------------------------|
|  | Asymptomatic<br>(n=28) | Symptomatic<br>(n=105) | Total<br>(n=133) | p-Value | Asymptomatic<br>(n=47) | Symptomatic<br>(n=70) | Total<br>(n=117) | p-Value |                                                   |
|  |                        |                        |                  |         |                        |                       |                  |         |                                                   |

|                  |           |           |       |      |           |           |       |      |        |
|------------------|-----------|-----------|-------|------|-----------|-----------|-------|------|--------|
| Median           | 40 (32-   | 47 (39-   | 44    | 0.02 | 45 (32-   | 64 (53-   | 58    | <0.0 | <0.001 |
| Age              | 46)       | 55)       | (36-  |      | 65)       | 75)       | (45-  | 01   |        |
| (IQR)            |           |           | 54)   |      |           |           | 70)   |      |        |
| <b>Gender</b>    |           |           |       |      |           |           |       |      |        |
| Female           | 8 (28.6)  | 12 (11.4) | 20    | 0.02 | 6 (12.8)  | 15 (21.4) | 21    | 0.23 | 0.54   |
|                  |           |           | (15.0 |      |           |           | (17.9 |      |        |
|                  |           |           | )     |      |           |           | )     |      |        |
| Male             | 20 (71.4) | 93 (88.6) | 113   |      | 41 (87.2) | 55 (78.6) | 96    |      |        |
|                  |           |           | (85.0 |      |           |           | (82.1 |      |        |
|                  |           |           | )     |      |           |           | )     |      |        |
| <b>Ethnicity</b> |           |           |       |      |           |           |       |      |        |
| Indigeno         | 6 (21.4)  | 6 (5.7)   | 12    | 0.00 | 6 (12.8)  | 3 (4.3)   | 9     | 0.44 | <0.001 |
| us               |           |           | (9.0) | 1    |           |           | (7.7) |      |        |
| Caucasia         | 10 (35.7) | 78 (74.3) | 88    |      | 14 (29.8) | 23 (32.9) | 37    |      |        |
| n                |           |           | (66.2 |      |           |           | (31.6 |      |        |
|                  |           |           | )     |      |           |           | )     |      |        |
| Other            | 3 (10.7)  | 4 (3.8)   | 7     |      | 16 (34.0) | 27 (38.6) | 43    |      |        |
|                  |           |           | (5.3) |      |           |           | (36.8 |      |        |
|                  |           |           | )     |      |           |           | )     |      |        |
| Unknow           | 9 (32.1)  | 17 (16.2) | 26    |      | 11 (23.4) | 17 (24.3) | 28    |      |        |
| n                |           |           | (19.5 |      |           |           | (23.9 |      |        |

|                         |           |           |              |      |           |           |              |      |        |
|-------------------------|-----------|-----------|--------------|------|-----------|-----------|--------------|------|--------|
|                         |           |           | )            |      |           |           | )            |      |        |
| <b>Municipality</b>     |           |           |              |      |           |           |              |      |        |
| Calgary                 | 9 (32.1)  | 32 (30.5) | 41<br>(30.8) | 0.62 | 10 (21.3) | 22 (31.4) | 32<br>(27.4) | 0.46 | 0.59   |
| Edmonton                | 15 (53.6) | 48 (45.7) | 63<br>(47.4) |      | 28 (59.6) | 35 (50.0) | 63<br>(53.8) |      |        |
| Other                   | 4 (14.3)  | 25 (23.8) | 29<br>(21.8) |      | 9 (19.1)  | 13 (18.6) | 22<br>(18.8) |      |        |
| <b>Country of Birth</b> |           |           |              |      |           |           |              |      |        |
| Canada                  | 16 (57.1) | 56 (53.3) | 72<br>(54.1) | 0.23 | 23 (48.9) | 16 (22.9) | 39<br>(33.3) | 0.01 | <0.001 |
| Outside of Canada       | 5 (17.9)  | 9 (8.6)   | 14<br>(10.5) |      | 17 (36.2) | 36 (51.4) | 53<br>(45.3) |      |        |
| Unknown                 | 7 (25.0)  | 40 (38.1) | 47           |      | 7 (14.9)  | 18 (25.7) | 25           |      |        |



|                 |           |           |              |           |           |           |              |      |        |
|-----------------|-----------|-----------|--------------|-----------|-----------|-----------|--------------|------|--------|
| n               |           |           | (35.3        |           |           |           | (21.4        |      |        |
|                 |           |           | )            |           |           |           | )            |      |        |
| <b>Decade</b>   |           |           |              |           |           |           |              |      |        |
| <b>of</b>       |           |           |              |           |           |           |              |      |        |
| <b>Diagnosi</b> |           |           |              |           |           |           |              |      |        |
| <b>s</b>        |           |           |              |           |           |           |              |      |        |
| 1970's          | 1 (3.6)   | 1 (1.0)   | 2<br>(1.5)   | 0.00<br>1 | 4 (8.5)   | 1 (1.4)   | 5<br>(4.3)   | 0.29 | <0.001 |
| 1980's          | 6 (21.4)  | 3 (2.9)   | 9<br>(6.8)   |           | 13 (27.7) | 15 (21.4) | 28<br>(23.9) |      |        |
| 1990's          | 3 (10.7)  | 5 (4.8)   | 8<br>(6.0)   |           | 6 (12.8)  | 9 (12.7)  | 15<br>(12.8) |      |        |
| 2000's          | 8 (28.6)  | 28 (26.7) | 36<br>(27.1) |           | 4 (8.5)   | 20 (28.6) | 24<br>(20.5) |      |        |
| 2010's          | 10 (35.7) | 68 (64.8) | 78<br>(58.6) |           | 20 (42.6) | 25 (35.7) | 45<br>(38.5) |      |        |
| <b>Sexual</b>   |           |           |              |           |           |           |              |      |        |

|                   |           |           |              |        |           |           |              |      |        |
|-------------------|-----------|-----------|--------------|--------|-----------|-----------|--------------|------|--------|
| <b>Partners</b>   |           |           |              |        |           |           |              |      |        |
| heterosexual      | 12 (42.9) | 46 (43.8) | 58<br>(43.6) | 1.00   | 30 (63.8) | 38 (54.3) | 68<br>(58.1) | 0.00 | <0.001 |
| Same Sex          | 14 (50.0) | 52 (49.5) | 66<br>(49.6) |        | 11 (23.4) | 5 (7.1)   | 16<br>(13.7) |      |        |
| Unknown           | 2 (7.1)   | 7 (6.7)   | 9<br>(6.8)   |        | 6 (12.8)  | 27 (38.6) | 33<br>(28.2) |      |        |
| <b>HIV Status</b> |           |           |              |        |           |           |              |      |        |
| Negative          | 5 (17.9)  | 68 (64.8) | 73<br>(54.9) | <0.001 | 19 (40.4) | 27 (38.6) | 46<br>(39.3) | 0.31 | <0.001 |
| Positive          | 17 (60.7) | 30 (28.6) | 47<br>(35.3) |        | 8 (17.0)  | 6 (8.6)   | 14<br>(12.0) |      |        |
| Unknown           | 6 (21.4)  | 7 (6.7)   | 13<br>(9.8)  |        | 20 (42.6) | 37 (52.9) | 57<br>(48.7) |      |        |

| Treatment    |           |           |            |      |           |           |           |        |      |
|--------------|-----------|-----------|------------|------|-----------|-----------|-----------|--------|------|
| Penicillin G | 22 (78.6) | 82 (78.1) | 104 (78.2) | 0.87 | 21 (44.7) | 63 (90.0) | 84 (71.8) | <0.001 | 0.43 |
| Ceftriaxone  | 3 (10.7)  | 14 (13.3) | 17 (12.8)  |      | 12 (25.5) | 5 (7.1)   | 17 (14.5) |        |      |
| Other        | 3 (10.7)  | 9 (8.6)   | 12 (9.0)   |      | 14 (29.8) | 2 (2.9)   | 16 (13.7) |        |      |

Among early neurosyphilis cases, 79.0% (n=105) were symptomatic; symptomatic cases were more likely to be older, male, Caucasian, recently diagnosed (2010's), and HIV negative compared to asymptomatic cases. Among late neurosyphilis cases, 59.8% (n=70) were symptomatic; symptomatic cases were more likely to be older, born outside of Canada, and treated with intravenous penicillin G, and less likely to have a same sex partner as compared to asymptomatic cases.

The majority (78.2%; n=136) of symptomatic cases reported a single manifestation. The most common clinical manifestation of the symptomatic cases (39.4%; n=69) was ocular involvement; early neurosyphilis cases were more likely to have ocular involvement (54.3%;

1  
2  
3 n=57) than late neurosyphilis cases (n=12; 17.1%; p<0.001). The first case of ocular syphilis was  
4 reported in 1990 with the majority (66.7%; n=46) of cases being diagnosed between 2010 and  
5  
6 2017. The second most common (34.3%; n=60) manifestation of symptomatic neurosyphilis was  
7  
8 cognitive impairment with significantly more late neurosyphilis cases (55.7%; n=39) reporting  
9  
10 these symptoms than early cases (20.0%; n=21; p<0.001). One-quarter of symptomatic cases  
11  
12 reported peripheral involvement (26.9%; n=47), seven (4.0%) reported strokes and seven cases  
13  
14 with central nervous system manifestations like ataxia, aphasia, and reduced level of  
15  
16 consciousness. Eleven (6.3%) cases reported auditory symptoms; all cases were diagnosed with  
17  
18 early infection (p=0.003). Thirteen (7.4%) cases reported other symptoms like headache or no  
19  
20 specific symptoms.  
21  
22  
23  
24  
25  
26  
27  
28  
29

30 Although the first HIV co-infected case was reported in 1986, over one-half (57.4%; n=35) of  
31  
32 HIV co-infected cases were reported between 2010 and 2017. The majority (62.2%; n= 46) of  
33  
34 cases with an unknown HIV status occurred between the 1970's and 1980's, prior to the clinical  
35  
36 availability of diagnostic serology. As well cases that had HIV test results were significantly  
37  
38 younger (47 years; IQR: 37-55) than cases without HIV test results (64 years; IQR: 44-70;  
39  
40 p<0.001).  
41  
42  
43  
44  
45  
46

47 Thirty-six (14.2%) of all the cases were diagnosed without a lumbar puncture result. Nearly all  
48  
49 of these clinical cases (97.2%; n=35) were symptomatic. The remaining asymptomatic case was  
50  
51 diagnosed based on an inadequate fall in RPR titres over time. There was no significant  
52  
53 difference by HIV status for those who had and did not have a lumbar puncture (p=0.62).  
54  
55  
56  
57  
58  
59  
60

1  
2  
3 Clinical parameters by HIV status are outlined in Figure 3. Of the 2 HIV-positive and 6 HIV-  
4  
5 negative cases with negative clinical parameters, all were symptomatic cases.  
6  
7  
8  
9

10 The majority (74.4%; n=189) of all cases were treated with intravenous penicillin G.

11  
12 Asymptomatic late neurosyphilis cases were less likely to be treated with penicillin G (44.7%;  
13  
14 n=21) as compared to late neurosyphilis (90.0%; n=63; p<0.001). There was a rise in the use of  
15  
16 ceftriaxone in late neurosyphilis treatment from no use in the 1970's to 1990's, to 12.5% (n=3)  
17  
18 in 2000's and 31.1% (n=14) in the 2010's. Other drug combinations for neurosyphilis was  
19  
20 highest in the 1970's (85.7%; n=6) and dropped to a low of 4.3% (n=1) in the 1990's.  
21  
22  
23  
24  
25  
26  
27

## 28 Discussion

29  
30 A review of the trends in reported cases of infectious syphilis from 1975 to 2016 in Alberta  
31  
32 shows a cycling in the number of cases over time. During this time period, the first major  
33  
34 outbreak of infectious syphilis occurred between 1981 and 1987, with the majority of cases  
35  
36 between 1983 and 1985.<sup>21</sup> A quiescent period of approximately two decades followed with a  
37  
38 resurgence in infectious cases in 2000 followed by a decline in 2011 and then another rise in  
39  
40 2015. These observations are consistent with a study of long term trends in reported primary  
41  
42 and secondary syphilis cases in the United States which showed recurrent peaks and troughs in  
43  
44 approximately 10-year cycles.<sup>22</sup> This pattern of periodic resurgence of syphilis has variously  
45  
46 been attributed to either failure to sustain control efforts, changing risk behaviours (such as  
47  
48 crack cocaine use), and waxing and waning partial host immunity to infection at the population  
49  
50 level.<sup>23,24</sup> Interestingly, our province observed a 20-year gap between the outbreak in the mid  
51  
52  
53  
54  
55  
56  
57  
58  
59  
60

1  
2  
3 1980s and the mid 2000s. The reasons for this prolonged gap are unclear but are likely multi-  
4  
5 factorial including a well-established and sustained prevention and control program for STIs in  
6  
7 the province, emergence of HIV and the mass education that occurred during this time period.  
8  
9  
10 Our observed rising rates of infectious syphilis since the mid-2000s are consistent with many  
11  
12 jurisdictions across Canada and the United States.<sup>15,25</sup> The rise in late latent syphilis in 2007 has  
13  
14 been attributed to the introduction of RSSS.<sup>26</sup>  
15  
16  
17  
18  
19

20 Some studies have reported a rise in cases of neurosyphilis related to outbreaks of infectious  
21  
22 syphilis. One possible explanation for this is that the overall rise in rates of infectious syphilis  
23  
24 could potentially increase the pool of persons progressing to neurosyphilis and tertiary syphilis.  
25  
26 For example, a study conducted in British Columbia, one of Alberta's neighboring provinces,  
27  
28 reported that in the context of rising rates of infectious syphilis, the neurosyphilis rate was 0.03  
29  
30 per 100,000 in 1992 and increased 27-fold to 0.8 per 100,000 in 2012.<sup>27</sup> Investigators from  
31  
32 Guangdong province in China similarly reported an incidence rate increase in neurosyphilis  
33  
34 cases from 0.21 cases per 100,000 persons in 2009 to 0.31 cases per 100,000 persons in 2014  
35  
36 and in tertiary cases from 0.28 cases per 100,000 persons in 2009 to 0.36 cases per 100,000  
37  
38 persons in 2014.<sup>28</sup> Neither of these studies, however, distinguished between early and late  
39  
40 neurosyphilis cases. In our review, we observed a significant rise in early neurosyphilis during  
41  
42 the outbreak periods and a significant decline after the outbreak periods, e.g. only one case  
43  
44 was observed in 2012 after the second outbreak. We had expected to see a sustained increase  
45  
46 in late neurosyphilis cases based on the hypothesis that the number of untreated infected  
47  
48 persons with syphilis would increase over time but there was no significant increase during the  
49  
50  
51  
52  
53  
54  
55  
56  
57  
58  
59  
60

1  
2  
3 overall observation period. Interestingly, a rise in late neurosyphilis cases was observed  
4  
5 towards the end of the outbreak periods, perhaps due to heightened awareness and increased  
6  
7 testing due to public health announcements during the outbreak periods.  
8  
9

10 Early neurosyphilis cases were more likely to be younger, Caucasian, born in Canada, HIV  
11  
12 positive and reporting same sex partners. These observations parallel the observed rise in  
13  
14 infectious syphilis during the third outbreak and may also be related to selection bias since  
15  
16 lumbar punctures were more likely to be performed in HIV positive persons in the early years,  
17  
18 especially those with low CD<sub>4</sub> counts (<350) and/or RPR  $\geq$  1:32 dilutions as recommended in the  
19  
20 Canadian STI Guidelines.<sup>29</sup>  
21  
22  
23  
24  
25  
26  
27

28 The most common manifestation (40%) of symptomatic neurosyphilis was ocular involvement  
29  
30 with cases of early neurosyphilis more likely than cases of late neurosyphilis to have ocular  
31  
32 involvement (54% vs 17%,  $p < 0.001$ ). Two-thirds of ocular cases were reported between 2010  
33  
34 and 2017, with 46.4% reported among MSM, similar to other studies.<sup>30</sup> Late neurosyphilis cases  
35  
36 were more likely to be older, born outside of Canada and less likely to report same sex  
37  
38 partners, paralleling the demographics of late latent cases of syphilis in our province (data not  
39  
40 shown).  
41  
42  
43  
44  
45  
46

47 Our study identified very few ( $n=3$ ) cardiovascular cases of tertiary syphilis with all cases  
48  
49 identified at the time of a diagnosis of aortic aneurysm. This likely represents an underestimate  
50  
51 in the actual number of cases of CV syphilis as we suspect that most patients with aortic  
52  
53 aneurysm or initial cardiovascular involvement do not have syphilis testing performed. In  
54  
55  
56  
57  
58  
59  
60

1  
2  
3 Alberta, the provincial STI program facilitates the assessment of all late stage syphilis cases by a  
4 physician who then conducts a neurological and cardiovascular examination. A chest  
5  
6 radiograph, recommended in the past in some jurisdictions to look for linear calcification of the  
7  
8 ascending aorta, a radiological sign of syphilitic aortitis is not routinely done. Chest radiographs  
9  
10 for the evaluation of CV syphilis in asymptomatic patients with LLS is of such low yield, that it is  
11  
12 not routinely recommended.<sup>31</sup> Neither clinical examination nor chest radiograph is likely to be  
13  
14 sensitive enough to identify cases of CV syphilis and given the presumed rarity of this condition  
15  
16 and that the treatment is the same as for LLS, further evaluations (e.g. echocardiograms) are  
17  
18 not warranted.  
19  
20  
21  
22  
23  
24  
25  
26  
27

28 No cases of gummatous syphilis were reported during our study period. Although syphilitic  
29  
30 gummas were reported in up to 15% cases in the pre-antibiotic era, it is possible that the  
31  
32 widespread use of antibiotics for other conditions, which may indirectly treat or partially treat  
33  
34 syphilis, has affected the occurrence.  
35  
36  
37  
38  
39

40 One of the strengths of our study is that there was consistent reporting of all cases with  
41  
42 positive syphilis serology over time by laboratories and active follow up by the provincial STI  
43  
44 program with health care providers. We were able to apply current case definitions  
45  
46 retrospectively to all cases; however, one of the limitations to retrospective review of data is  
47  
48 the possibility of inaccurate classification of cases. Our review by two experienced medical  
49  
50 consultants resulted in only one case where insufficient information was available to classify  
51  
52 the case with reasonable accuracy. Additional study limitations include changes in data  
53  
54  
55  
56  
57  
58  
59  
60



1  
2  
3 collection practices over time. The information about gender of sex partners may have been  
4  
5 inaccurate in earlier years due to stigma associated with same sex partners. Routine testing for  
6  
7 HIV in cases of syphilis was also not conducted in earlier years and as such the number of  
8  
9 concurrent HIV infections may be underestimated.  
10  
11

12  
13  
14  
15 In summary, our review of tertiary and neurosyphilis cases in Alberta over a 44-year period  
16  
17 found that early and late neurosyphilis cases continue to occur in the context of cycling of  
18  
19 infectious syphilis outbreaks. Ocular disease was the most common manifestation of  
20  
21 neurosyphilis in our study. On the other hand, cardiovascular syphilis was extremely rare and  
22  
23 no cases of gumma were identified. Ongoing identification of syphilis cases with prompt  
24  
25 treatment and follow up continues to be important in the context of resurgence of infectious  
26  
27 syphilis worldwide.  
28  
29  
30  
31

32  
33  
34  
35 **Author contributions:** TL reviewed hard copy records of all cases and conducted data entry into  
36  
37 an Excel file; PS and AS reviewed and re-classified all cases; JG conducted data analysis; JG and  
38  
39 AS drafted initial versions of the manuscript; all authors helped develop the study design and  
40  
41 reviewed drafts of the manuscript.  
42  
43  
44  
45  
46  
47  
48  
49  
50  
51  
52  
53  
54  
55  
56  
57  
58  
59  
60

## References

1. Golden MR, Marra CM, Holmes KK. Update on syphilis: resurgence of an old problem. *JAMA* 2003; 290: 1510-4.
2. Gjestland T. The Oslo study of untreated syphilis: An epidemiologic investigation of the natural course of syphilitic infection based on a restudy of the Boeck-Bruusgaard material. *J Chronic Dis* 1955; 2: 311-44.
3. Kent ME, Romanelli F. Examining syphilis: an update on epidemiology, clinical manifestations, and management. *Annals of Pharmacotherapy* 2008: 226-36.
4. Kampmeier RH. The late manifestations of syphilis: skeletal, visceral and cardiovascular. *Med Clin North Am* 1964; 48:667-697.
5. Cole HN. Cooperative clinical studies in the treatment of syphilis. The effect of specific therapy on the prophylaxis and progress of cardiovascular syphilis. *JAMA* 1937; 108:1861-1866.
6. Howles JK. *Synopsis of clinical syphilis*. St. Louis, MO: Mosby Co, 1943.
7. Marra CM. Neurosyphilis. *Continuum (Minneap Minn)* 2015;21:1714-28.
8. Merritt HH. *Neurosyphilis*. New York, NY: Oxford University Press, 1946.
9. Berry CD. Neurologic relapse after benzathine penicillin therapy for secondary syphilis in a patient with HIV infection. *N Engl J Med* 1987;316:1587-15.
10. Johns DR. Alteration in the natural history of neurosyphilis by concurrent infection with the human immunodeficiency virus. *N Engl Med* 1987;316:1569-1572.
11. Rolfs RT. A randomized trial of enhanced therapy for early syphilis in patients with or without human immunodeficiency virus infection. *N Engl J Med* 1997;337:307-314.

- 1  
2  
3 12. Lukehart SA, Hook EW III, Baker-Zander SA, *et al.* Invasion of the central nervous system  
4  
5 by *Treponema pallidum*: implications for diagnosis and treatment. *Ann Intern Med* 1988;  
6  
7 109: 855–62.  
8  
9
- 10 13. Musher DM. Effect of human immunodeficiency virus (HIV) infection on the course of  
11  
12 syphilis and on the response to treatment. *Ann Intern Med* 1990;113:872-881.  
13  
14
- 15 14. Bhatti MT. Optic neuropathy from viruses and spirochetes. *Int Ophthalmol Clin* 2007;47:  
16  
17 37-66  
18  
19
- 20 15. Public Health Agency of Canada. Report on Sexually Transmitted Infections in Canada:  
21  
22 2013-2014. [https://www.canada.ca/en/public-health/services/publications/diseases-](https://www.canada.ca/en/public-health/services/publications/diseases-conditions/report-sexually-transmitted-infections-canada-2013-14.html#a41)  
23  
24 [conditions/report-sexually-transmitted-infections-canada-2013-14.html#a41](https://www.canada.ca/en/public-health/services/publications/diseases-conditions/report-sexually-transmitted-infections-canada-2013-14.html#a41) (accessed  
25  
26 27 March 2018).  
27  
28  
29
- 30 16. Government of Alberta. Interactive Health Data Application. STI-Age-Sex Specific  
31  
32 Incidence Rate.  
33  
34 [http://www.ahw.gov.ab.ca/IHDA\\_Retrieval/redirectToURL.do?cat=81&subCat=466](http://www.ahw.gov.ab.ca/IHDA_Retrieval/redirectToURL.do?cat=81&subCat=466)  
35  
36 (accessed on 12 June 2018).  
37  
38  
39
- 40 17. Daey Ouwens IM, Koedijk FD, Fiolet AT, *et al.* Neurosyphilis in the mixed urban-rural  
41  
42 community of the Netherlands. *Acta neuropsychiatrica* 2014;26:186-192.  
43  
44
- 45 18. Government of Alberta Public Health Notifiable Disease Management Guidelines:  
46  
47 Syphilis July 2012. [https://open.alberta.ca/dataset/e234483d-fc2d-4bbf-a248-](https://open.alberta.ca/dataset/e234483d-fc2d-4bbf-a248-e0442808187e/resource/244eacc-c0ac-4933-9347-a908cbbc45f0/download/Guidelines-Syphilis-2012.pdf)  
48  
49 [e0442808187e/resource/244eacc-c0ac-4933-9347-](https://open.alberta.ca/dataset/e234483d-fc2d-4bbf-a248-e0442808187e/resource/244eacc-c0ac-4933-9347-a908cbbc45f0/download/Guidelines-Syphilis-2012.pdf)  
50  
51 [a908cbbc45f0/download/Guidelines-Syphilis-2012.pdf](https://open.alberta.ca/dataset/e234483d-fc2d-4bbf-a248-e0442808187e/resource/244eacc-c0ac-4933-9347-a908cbbc45f0/download/Guidelines-Syphilis-2012.pdf) (accessed 26 April 2018).  
52  
53  
54  
55  
56  
57  
58  
59  
60

- 1  
2  
3 19. Government of Alberta. Interactive Health Data Application. Population Estimates.  
4  
5 [http://www.ahw.gov.ab.ca/IHDA\\_Retrieval/redirectToURL.do?cat=5&subCat=63](http://www.ahw.gov.ab.ca/IHDA_Retrieval/redirectToURL.do?cat=5&subCat=63)  
6  
7 (accessed on 1 June 2018).  
8  
9
- 10  
11 20. Government of Alberta Public Health Notifiable Disease Management Guidelines:  
12  
13 Human Immunodeficiency Virus (HIV), January 2011.  
14  
15 <https://open.alberta.ca/publications/human-immunodeficiency-virus-hiv> (accessed 24  
16  
17 July 2018).  
18  
19
- 20  
21 21. Romanowski B, Sutherland R, Love EJ, Mooney D. Epidemiology of an outbreak of  
22  
23 infectious syphilis in Alberta. *Int J STD AIDS* 1991;2:424-7.  
24  
25
- 26  
27 22. Nakashima AK, Rolfs RT, Flock ML, *et al.* Epidemiology of syphilis in the United States,  
28  
29 1941--1993. *Sex Transm Dis* 1996;23:16-23.  
30
- 31  
32 23. Grassly NC, Fraser C, Garnett GP. Host immunity and synchronized epidemics of syphilis  
33  
34 across the United States. *Nature* 2005; 433: 417-21.  
35
- 36  
37 24. Grenfell B, Bjornstad O. Epidemic cycling and immunity. *Nature* 2005;433:366-7.  
38
- 39  
40 25. Patton ME, Su JR, Nelson R, Weinstock H; Centers for Disease Control and Prevention  
41  
42 (CDC). Primary and secondary syphilis--United States, 2005-2013.  
43  
44 *MMWR Morb Mortal Wkly Rep* 2014;63:402-6.  
45
- 46  
47 26. Gratrix J, Plitt S, Lee BE, *et al.* Impact of Reverse Sequence Syphilis Screening on New  
48  
49 Diagnoses of Late Latent Syphilis in Edmonton, Canada. *Sex Transm Dis* 2012;39:528-30.  
50
- 51  
52 27. Lester RT, Morshed M, Gilbert M, Hottes T. Syphilis and neurosyphilis increase to  
53  
54 historic levels in BC. *BC Med* 2013; 55: 204-5.  
55  
56  
57  
58  
59  
60

- 1  
2  
3 28. Tang W, Huang S, Chen L, *et al.* Late Neurosyphilis and Tertiary Syphilis in Guangdong  
4 Province, China: Results from a Cross-sectional Study. *Sci Rep* 2017;7:45339.  
5  
6  
7  
8 29. Public Health Agency of Canada. Canadian Guidelines on Sexually Transmitted  
9 Infections-Management and treatment of specific infections-Syphilis.  
10  
11 [https://www.canada.ca/en/public-health/services/infectious-diseases/sexual-health-](https://www.canada.ca/en/public-health/services/infectious-diseases/sexual-health-sexually-transmitted-infections/canadian-guidelines/sexually-transmitted-infections/canadian-guidelines-sexually-transmitted-infections-27.html)  
12 [sexually-transmitted-infections/canadian-guidelines/sexually-transmitted-](https://www.canada.ca/en/public-health/services/infectious-diseases/sexual-health-sexually-transmitted-infections/canadian-guidelines/sexually-transmitted-infections/canadian-guidelines-sexually-transmitted-infections-27.html)  
13 [infections/canadian-guidelines-sexually-transmitted-](https://www.canada.ca/en/public-health/services/infectious-diseases/sexual-health-sexually-transmitted-infections/canadian-guidelines/sexually-transmitted-infections/canadian-guidelines-sexually-transmitted-infections-27.html)  
14 [infections/canadian-guidelines-](https://www.canada.ca/en/public-health/services/infectious-diseases/sexual-health-sexually-transmitted-infections/canadian-guidelines/sexually-transmitted-infections/canadian-guidelines-sexually-transmitted-infections-27.html)  
15 [infections/canadian-guidelines-](https://www.canada.ca/en/public-health/services/infectious-diseases/sexual-health-sexually-transmitted-infections/canadian-guidelines/sexually-transmitted-infections/canadian-guidelines-sexually-transmitted-infections-27.html)  
16 [infections/canadian-guidelines-](https://www.canada.ca/en/public-health/services/infectious-diseases/sexual-health-sexually-transmitted-infections/canadian-guidelines/sexually-transmitted-infections/canadian-guidelines-sexually-transmitted-infections-27.html)  
17 [infections/canadian-guidelines-](https://www.canada.ca/en/public-health/services/infectious-diseases/sexual-health-sexually-transmitted-infections/canadian-guidelines/sexually-transmitted-infections/canadian-guidelines-sexually-transmitted-infections-27.html)  
18 [infections/canadian-guidelines-](https://www.canada.ca/en/public-health/services/infectious-diseases/sexual-health-sexually-transmitted-infections/canadian-guidelines/sexually-transmitted-infections/canadian-guidelines-sexually-transmitted-infections-27.html)  
19 [infections/canadian-guidelines-](https://www.canada.ca/en/public-health/services/infectious-diseases/sexual-health-sexually-transmitted-infections/canadian-guidelines/sexually-transmitted-infections/canadian-guidelines-sexually-transmitted-infections-27.html)  
20 [infections/canadian-guidelines-](https://www.canada.ca/en/public-health/services/infectious-diseases/sexual-health-sexually-transmitted-infections/canadian-guidelines/sexually-transmitted-infections/canadian-guidelines-sexually-transmitted-infections-27.html)  
21 [infections/canadian-guidelines-](https://www.canada.ca/en/public-health/services/infectious-diseases/sexual-health-sexually-transmitted-infections/canadian-guidelines/sexually-transmitted-infections/canadian-guidelines-sexually-transmitted-infections-27.html)  
22 [infections/canadian-guidelines-](https://www.canada.ca/en/public-health/services/infectious-diseases/sexual-health-sexually-transmitted-infections/canadian-guidelines/sexually-transmitted-infections/canadian-guidelines-sexually-transmitted-infections-27.html)  
23 [infections/canadian-guidelines-](https://www.canada.ca/en/public-health/services/infectious-diseases/sexual-health-sexually-transmitted-infections/canadian-guidelines/sexually-transmitted-infections/canadian-guidelines-sexually-transmitted-infections-27.html)  
24 [infections/canadian-guidelines-](https://www.canada.ca/en/public-health/services/infectious-diseases/sexual-health-sexually-transmitted-infections/canadian-guidelines/sexually-transmitted-infections/canadian-guidelines-sexually-transmitted-infections-27.html)  
25 [infections/canadian-guidelines-](https://www.canada.ca/en/public-health/services/infectious-diseases/sexual-health-sexually-transmitted-infections/canadian-guidelines/sexually-transmitted-infections/canadian-guidelines-sexually-transmitted-infections-27.html)  
26 [infections/canadian-guidelines-](https://www.canada.ca/en/public-health/services/infectious-diseases/sexual-health-sexually-transmitted-infections/canadian-guidelines/sexually-transmitted-infections/canadian-guidelines-sexually-transmitted-infections-27.html)  
27 [infections/canadian-guidelines-](https://www.canada.ca/en/public-health/services/infectious-diseases/sexual-health-sexually-transmitted-infections/canadian-guidelines/sexually-transmitted-infections/canadian-guidelines-sexually-transmitted-infections-27.html)  
28 [infections/canadian-guidelines-](https://www.canada.ca/en/public-health/services/infectious-diseases/sexual-health-sexually-transmitted-infections/canadian-guidelines/sexually-transmitted-infections/canadian-guidelines-sexually-transmitted-infections-27.html)  
29 [infections/canadian-guidelines-](https://www.canada.ca/en/public-health/services/infectious-diseases/sexual-health-sexually-transmitted-infections/canadian-guidelines/sexually-transmitted-infections/canadian-guidelines-sexually-transmitted-infections-27.html)  
30 [infections/canadian-guidelines-](https://www.canada.ca/en/public-health/services/infectious-diseases/sexual-health-sexually-transmitted-infections/canadian-guidelines/sexually-transmitted-infections/canadian-guidelines-sexually-transmitted-infections-27.html)  
31 [infections/canadian-guidelines-](https://www.canada.ca/en/public-health/services/infectious-diseases/sexual-health-sexually-transmitted-infections/canadian-guidelines/sexually-transmitted-infections/canadian-guidelines-sexually-transmitted-infections-27.html)  
32 [infections/canadian-guidelines-](https://www.canada.ca/en/public-health/services/infectious-diseases/sexual-health-sexually-transmitted-infections/canadian-guidelines/sexually-transmitted-infections/canadian-guidelines-sexually-transmitted-infections-27.html)  
33 [infections/canadian-guidelines-](https://www.canada.ca/en/public-health/services/infectious-diseases/sexual-health-sexually-transmitted-infections/canadian-guidelines/sexually-transmitted-infections/canadian-guidelines-sexually-transmitted-infections-27.html)  
34 [infections/canadian-guidelines-](https://www.canada.ca/en/public-health/services/infectious-diseases/sexual-health-sexually-transmitted-infections/canadian-guidelines/sexually-transmitted-infections/canadian-guidelines-sexually-transmitted-infections-27.html)  
35 [infections/canadian-guidelines-](https://www.canada.ca/en/public-health/services/infectious-diseases/sexual-health-sexually-transmitted-infections/canadian-guidelines/sexually-transmitted-infections/canadian-guidelines-sexually-transmitted-infections-27.html)  
36 [infections/canadian-guidelines-](https://www.canada.ca/en/public-health/services/infectious-diseases/sexual-health-sexually-transmitted-infections/canadian-guidelines/sexually-transmitted-infections/canadian-guidelines-sexually-transmitted-infections-27.html)  
37 [infections/canadian-guidelines-](https://www.canada.ca/en/public-health/services/infectious-diseases/sexual-health-sexually-transmitted-infections/canadian-guidelines/sexually-transmitted-infections/canadian-guidelines-sexually-transmitted-infections-27.html)  
38 [infections/canadian-guidelines-](https://www.canada.ca/en/public-health/services/infectious-diseases/sexual-health-sexually-transmitted-infections/canadian-guidelines/sexually-transmitted-infections/canadian-guidelines-sexually-transmitted-infections-27.html)  
39 [infections/canadian-guidelines-](https://www.canada.ca/en/public-health/services/infectious-diseases/sexual-health-sexually-transmitted-infections/canadian-guidelines/sexually-transmitted-infections/canadian-guidelines-sexually-transmitted-infections-27.html)  
40 [infections/canadian-guidelines-](https://www.canada.ca/en/public-health/services/infectious-diseases/sexual-health-sexually-transmitted-infections/canadian-guidelines/sexually-transmitted-infections/canadian-guidelines-sexually-transmitted-infections-27.html)  
41 [infections/canadian-guidelines-](https://www.canada.ca/en/public-health/services/infectious-diseases/sexual-health-sexually-transmitted-infections/canadian-guidelines/sexually-transmitted-infections/canadian-guidelines-sexually-transmitted-infections-27.html)  
42 [infections/canadian-guidelines-](https://www.canada.ca/en/public-health/services/infectious-diseases/sexual-health-sexually-transmitted-infections/canadian-guidelines/sexually-transmitted-infections/canadian-guidelines-sexually-transmitted-infections-27.html)  
43 [infections/canadian-guidelines-](https://www.canada.ca/en/public-health/services/infectious-diseases/sexual-health-sexually-transmitted-infections/canadian-guidelines/sexually-transmitted-infections/canadian-guidelines-sexually-transmitted-infections-27.html)  
44 [infections/canadian-guidelines-](https://www.canada.ca/en/public-health/services/infectious-diseases/sexual-health-sexually-transmitted-infections/canadian-guidelines/sexually-transmitted-infections/canadian-guidelines-sexually-transmitted-infections-27.html)  
45 [infections/canadian-guidelines-](https://www.canada.ca/en/public-health/services/infectious-diseases/sexual-health-sexually-transmitted-infections/canadian-guidelines/sexually-transmitted-infections/canadian-guidelines-sexually-transmitted-infections-27.html)  
46 [infections/canadian-guidelines-](https://www.canada.ca/en/public-health/services/infectious-diseases/sexual-health-sexually-transmitted-infections/canadian-guidelines/sexually-transmitted-infections/canadian-guidelines-sexually-transmitted-infections-27.html)  
47 [infections/canadian-guidelines-](https://www.canada.ca/en/public-health/services/infectious-diseases/sexual-health-sexually-transmitted-infections/canadian-guidelines/sexually-transmitted-infections/canadian-guidelines-sexually-transmitted-infections-27.html)  
48 [infections/canadian-guidelines-](https://www.canada.ca/en/public-health/services/infectious-diseases/sexual-health-sexually-transmitted-infections/canadian-guidelines/sexually-transmitted-infections/canadian-guidelines-sexually-transmitted-infections-27.html)  
49 [infections/canadian-guidelines-](https://www.canada.ca/en/public-health/services/infectious-diseases/sexual-health-sexually-transmitted-infections/canadian-guidelines/sexually-transmitted-infections/canadian-guidelines-sexually-transmitted-infections-27.html)  
50 [infections/canadian-guidelines-](https://www.canada.ca/en/public-health/services/infectious-diseases/sexual-health-sexually-transmitted-infections/canadian-guidelines/sexually-transmitted-infections/canadian-guidelines-sexually-transmitted-infections-27.html)  
51 [infections/canadian-guidelines-](https://www.canada.ca/en/public-health/services/infectious-diseases/sexual-health-sexually-transmitted-infections/canadian-guidelines/sexually-transmitted-infections/canadian-guidelines-sexually-transmitted-infections-27.html)  
52 [infections/canadian-guidelines-](https://www.canada.ca/en/public-health/services/infectious-diseases/sexual-health-sexually-transmitted-infections/canadian-guidelines/sexually-transmitted-infections/canadian-guidelines-sexually-transmitted-infections-27.html)  
53 [infections/canadian-guidelines-](https://www.canada.ca/en/public-health/services/infectious-diseases/sexual-health-sexually-transmitted-infections/canadian-guidelines/sexually-transmitted-infections/canadian-guidelines-sexually-transmitted-infections-27.html)  
54 [infections/canadian-guidelines-](https://www.canada.ca/en/public-health/services/infectious-diseases/sexual-health-sexually-transmitted-infections/canadian-guidelines/sexually-transmitted-infections/canadian-guidelines-sexually-transmitted-infections-27.html)  
55 [infections/canadian-guidelines-](https://www.canada.ca/en/public-health/services/infectious-diseases/sexual-health-sexually-transmitted-infections/canadian-guidelines/sexually-transmitted-infections/canadian-guidelines-sexually-transmitted-infections-27.html)  
56 [infections/canadian-guidelines-](https://www.canada.ca/en/public-health/services/infectious-diseases/sexual-health-sexually-transmitted-infections/canadian-guidelines/sexually-transmitted-infections/canadian-guidelines-sexually-transmitted-infections-27.html)  
57 [infections/canadian-guidelines-](https://www.canada.ca/en/public-health/services/infectious-diseases/sexual-health-sexually-transmitted-infections/canadian-guidelines/sexually-transmitted-infections/canadian-guidelines-sexually-transmitted-infections-27.html)  
58 [infections/canadian-guidelines-](https://www.canada.ca/en/public-health/services/infectious-diseases/sexual-health-sexually-transmitted-infections/canadian-guidelines/sexually-transmitted-infections/canadian-guidelines-sexually-transmitted-infections-27.html)  
59 [infections/canadian-guidelines-](https://www.canada.ca/en/public-health/services/infectious-diseases/sexual-health-sexually-transmitted-infections/canadian-guidelines/sexually-transmitted-infections/canadian-guidelines-sexually-transmitted-infections-27.html)  
60 [infections/canadian-guidelines-](https://www.canada.ca/en/public-health/services/infectious-diseases/sexual-health-sexually-transmitted-infections/canadian-guidelines/sexually-transmitted-infections/canadian-guidelines-sexually-transmitted-infections-27.html)  
20 July 2018).
30. Oliver SE, Aubin M, Atwell L, *et al.* Ocular Syphilis - Eight Jurisdictions, United States, 2014-2015. *MMWR Morb Mortal Wkly Rep* 2016;65:1185-1188.
31. Dabis R, Radcliffe K. Is it useful to perform chest x-ray in asymptomatic patients with late latent syphilis. *Int J STD AIDS* 2011;22:105-6.

1  
2  
3 Figure 1. Rate per 100,000 Population of Syphilis by Type and Diagnosis Year (Alberta, Canada,  
4  
5 1975-2016)  
6  
7  
8  
9

10 Figure 2. Rates of Early and Late Neurosyphilis during 2 Different Outbreak Periods with Linear  
11  
12 Trend Line (Alberta, 1975-2016)  
13  
14  
15

16  
17 Figure 3: Algorithm of diagnosis of neurosyphilis among HIV-positive and HIV-negative cases  
18  
19 (Alberta, 1975-March 2017)  
20  
21  
22  
23  
24  
25  
26  
27  
28  
29  
30  
31  
32  
33  
34  
35  
36  
37  
38  
39  
40  
41  
42  
43  
44  
45  
46  
47  
48  
49  
50  
51  
52  
53  
54  
55  
56  
57  
58  
59  
60

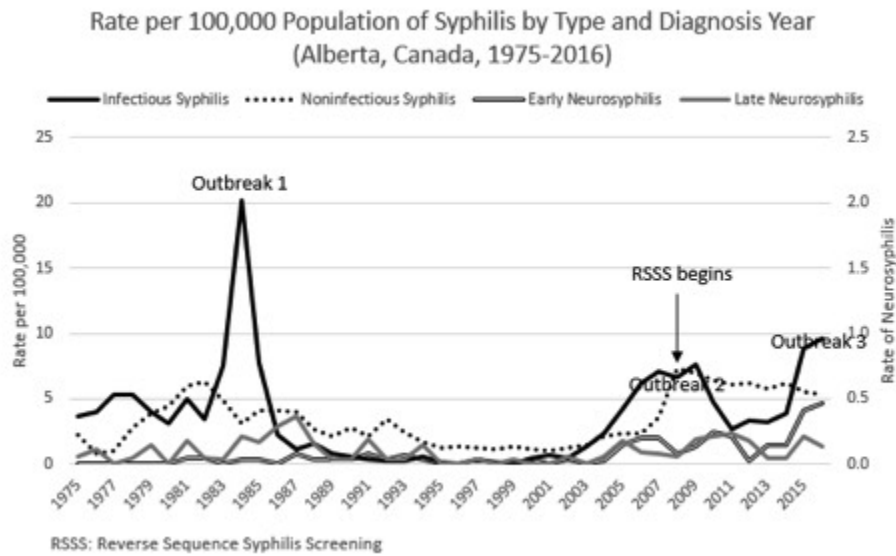

Figure 1. Rate per 100,000 Population of Syphilis by Type and Diagnosis Year (Alberta, Canada, 1975-2016)

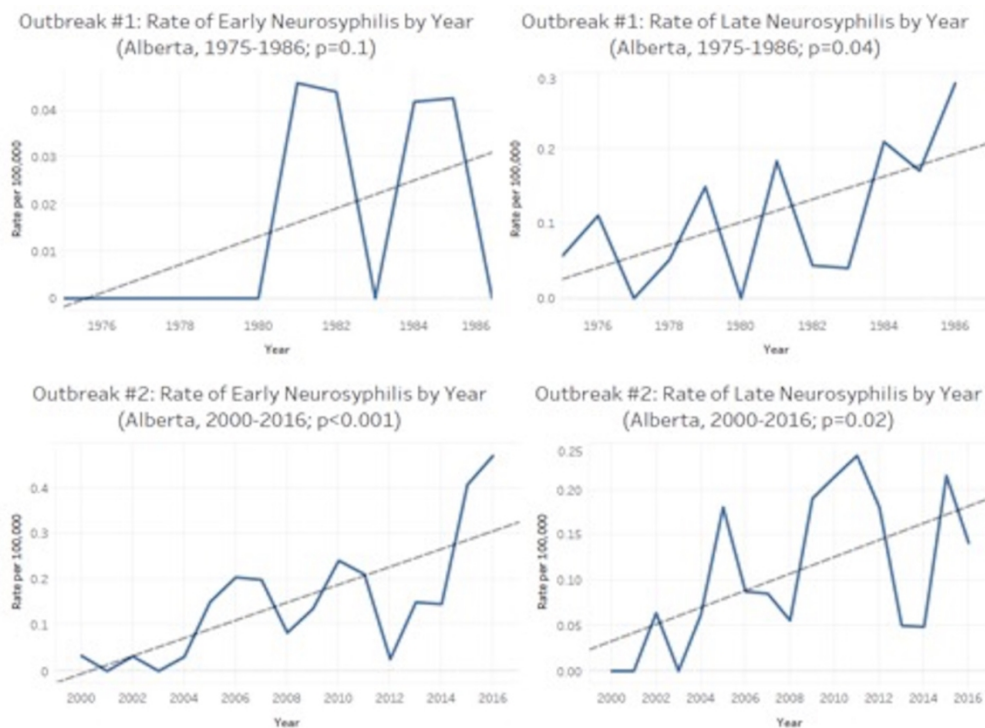

Figure 2. Rates of Early and Late Neurosyphilis during 2 Different Outbreak Periods with Linear Trend Line (Alberta, 1975-2016)

122x90mm (300 x 300 DPI)



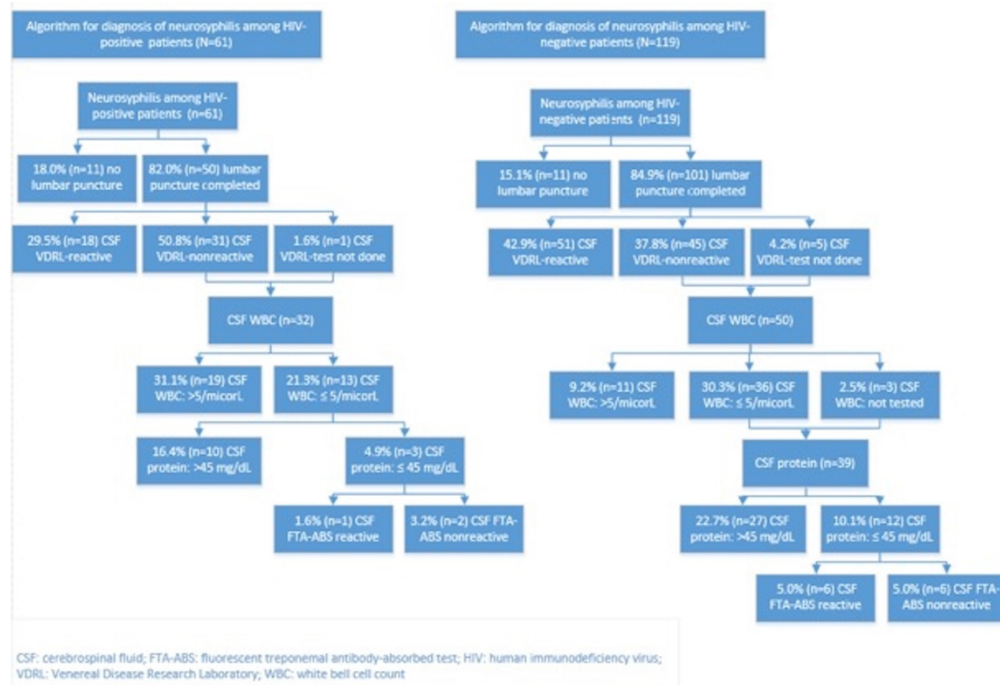

Figure 3: Algorithm of diagnosis of neurosyphilis among HIV-positive and HIV-negative cases (Alberta, 1975-March 2017)

130x90mm (300 x 300 DPI)

STROBE Statement—Checklist of items that should be included in reports of *cross-sectional studies*

|                              | Item No | Recommendation                                                                                                                                                                                               | Reported on page # |
|------------------------------|---------|--------------------------------------------------------------------------------------------------------------------------------------------------------------------------------------------------------------|--------------------|
| <b>Title and abstract</b>    | 1       | (a) Indicate the study's design with a commonly used term in the title or the abstract                                                                                                                       | 1                  |
|                              |         | (b) Provide in the abstract an informative and balanced summary of what was done and what was found                                                                                                          | 2                  |
| <b>Introduction</b>          |         |                                                                                                                                                                                                              |                    |
| Background/rationale         | 2       | Explain the scientific background and rationale for the investigation being reported                                                                                                                         | 4-5                |
| Objectives                   | 3       | State specific objectives, including any prespecified hypotheses                                                                                                                                             | 5-6                |
| <b>Methods</b>               |         |                                                                                                                                                                                                              |                    |
| Study design                 | 4       | Present key elements of study design early in the paper                                                                                                                                                      | 6                  |
| Setting                      | 5       | Describe the setting, locations, and relevant dates, including periods of recruitment, exposure, follow-up, and data collection                                                                              | 6                  |
| Participants                 | 6       | (a) Give the eligibility criteria, and the sources and methods of selection of participants                                                                                                                  | 6                  |
| Variables                    | 7       | Clearly define all outcomes, exposures, predictors, potential confounders, and effect modifiers. Give diagnostic criteria, if applicable                                                                     | 6-7                |
| Data sources/<br>measurement | 8*      | For each variable of interest, give sources of data and details of methods of assessment (measurement). Describe comparability of assessment methods if there is more than one group                         | 7                  |
| Bias                         | 9       | Describe any efforts to address potential sources of bias                                                                                                                                                    | 6                  |
| Study size                   | 10      | Explain how the study size was arrived at                                                                                                                                                                    | 6                  |
| Quantitative<br>variables    | 11      | Explain how quantitative variables were handled in the analyses. If applicable, describe which groupings were chosen and why                                                                                 | 7                  |
| Statistical methods          | 12      | (a) Describe all statistical methods, including those used to control for confounding                                                                                                                        | 7                  |
|                              |         | (b) Describe any methods used to examine subgroups and interactions                                                                                                                                          | N/A                |
|                              |         | (c) Explain how missing data were addressed                                                                                                                                                                  | 7                  |
|                              |         | (d) If applicable, describe analytical methods taking account of sampling strategy                                                                                                                           | N/A                |
|                              |         | (e) Describe any sensitivity analyses                                                                                                                                                                        | N/A                |
| <b>Results</b>               |         |                                                                                                                                                                                                              |                    |
| Participants                 | 13*     | (a) Report numbers of individuals at each stage of study—eg numbers potentially eligible, examined for eligibility, confirmed eligible, included in the study, completing follow-up, and analysed            | 7-8                |
|                              |         | (b) Give reasons for non-participation at each stage                                                                                                                                                         | N/A                |
|                              |         | (c) Consider use of a flow diagram                                                                                                                                                                           | N/A                |
| Descriptive data             | 14*     | (a) Give characteristics of study participants (eg demographic, clinical, social) and information on exposures and potential confounders                                                                     | Table 2            |
|                              |         | (b) Indicate number of participants with missing data for each variable of interest                                                                                                                          | Table 2            |
| Outcome data                 | 15*     | Report numbers of outcome events or summary measures                                                                                                                                                         | 8                  |
| Main results                 | 16      | (a) Give unadjusted estimates and, if applicable, confounder-adjusted estimates and their precision (eg, 95% confidence interval). Make clear which confounders were adjusted for and why they were included |                    |

|                          |    |                                                                                                                                                                            |                 |
|--------------------------|----|----------------------------------------------------------------------------------------------------------------------------------------------------------------------------|-----------------|
|                          |    | (b) Report category boundaries when continuous variables were categorized                                                                                                  | Table 2         |
|                          |    | (c) If relevant, consider translating estimates of relative risk into absolute risk for a meaningful time period                                                           | N/A             |
| Other analyses           | 17 | Report other analyses done—eg analyses of subgroups and interactions, and sensitivity analyses                                                                             | Figure 2<br>8-9 |
| <b>Discussion</b>        |    |                                                                                                                                                                            |                 |
| Key results              | 18 | Summarise key results with reference to study objectives                                                                                                                   | 11-12           |
| Limitations              | 19 | Discuss limitations of the study, taking into account sources of potential bias or imprecision. Discuss both direction and magnitude of any potential bias                 | 14              |
| Interpretation           | 20 | Give a cautious overall interpretation of results considering objectives, limitations, multiplicity of analyses, results from similar studies, and other relevant evidence | 15              |
| Generalisability         | 21 | Discuss the generalisability (external validity) of the study results                                                                                                      | 15              |
| <b>Other information</b> |    |                                                                                                                                                                            |                 |
| Funding                  | 22 | Give the source of funding and the role of the funders for the present study and, if applicable, for the original study on which the present article is based              | 3               |

\*Give information separately for exposed and unexposed groups.

**Note:** An Explanation and Elaboration article discusses each checklist item and gives methodological background and published examples of transparent reporting. The STROBE checklist is best used in conjunction with this article (freely available on the Web sites of PLoS Medicine at <http://www.plosmedicine.org/>, Annals of Internal Medicine at <http://www.annals.org/>, and Epidemiology at <http://www.epidem.com/>). Information on the STROBE Initiative is available at [www.strobe-statement.org](http://www.strobe-statement.org).

# BMJ Open

## Retrospective Review of Tertiary and Neurosyphilis Cases in Alberta, 1973 to 2017

|                                 |                                                                                                                                                                                                                                                                                                                                                                                 |
|---------------------------------|---------------------------------------------------------------------------------------------------------------------------------------------------------------------------------------------------------------------------------------------------------------------------------------------------------------------------------------------------------------------------------|
| Journal:                        | <i>BMJ Open</i>                                                                                                                                                                                                                                                                                                                                                                 |
| Manuscript ID                   | bmjopen-2018-025995.R1                                                                                                                                                                                                                                                                                                                                                          |
| Article Type:                   | Research                                                                                                                                                                                                                                                                                                                                                                        |
| Date Submitted by the Author:   | 18-Mar-2019                                                                                                                                                                                                                                                                                                                                                                     |
| Complete List of Authors:       | Landry, Takaaki; University of Alberta<br>Smyczek, Petra; University of Alberta, Medicine/Infectious Diseases; Alberta Health Services<br>Cooper, Ryan; University of Alberta<br>Gratrix, Jennifer<br>Bertholet, Lindsay; Alberta Health Services<br>Read, Ron<br>Romanowski, Barbara; University of Alberta<br>Singh , AE; University of Alberta, Medicine/Infectious Diseases |
| <b>Primary Subject Heading</b>: | Infectious diseases                                                                                                                                                                                                                                                                                                                                                             |
| Secondary Subject Heading:      | Epidemiology                                                                                                                                                                                                                                                                                                                                                                    |
| Keywords:                       | Neurology < INTERNAL MEDICINE, SEXUAL MEDICINE, GENITOURINARY MEDICINE                                                                                                                                                                                                                                                                                                          |
|                                 |                                                                                                                                                                                                                                                                                                                                                                                 |

SCHOLARONE™  
Manuscripts

## Retrospective Review of Tertiary and Neurosyphilis Cases in Alberta, 1973 to 2017

### Authors and Affiliations:

Takaaki Landry BSc<sup>1</sup>; Petra Smyczek MD<sup>1,2,3</sup>; Ryan Cooper MD<sup>1</sup>; Jennifer Gratrix MSc<sup>2</sup>; Lindsay Bertholet MN<sup>2</sup>; Ron Read MD PhD<sup>4</sup>; Barbara Romanowski MD<sup>1,3</sup>; Ameeta E. Singh BMBS MSc<sup>1,3</sup>

<sup>1</sup>University of Alberta, Edmonton, Canada; <sup>2</sup>Provincial STI Services, Alberta Health Services, Edmonton, Canada; <sup>3</sup>Edmonton STI Clinic, Alberta Health Services, Edmonton, Canada;

<sup>4</sup>University of Calgary, Calgary, Alberta, Canada

**Key Words:** Syphilis, neurosyphilis, epidemiology, tertiary syphilis

**Funding Statement:** TL received funding as a post secondary summer student from Alberta Health Services.

**Competing Interests:** The authors declare no competing interests.

**Data Sharing Statement:** No additional data available

1  
2  
3 **Corresponding Author:**  
4

5 Dr. Ameeta Singh, BMBS (UK), MSc, FRCPC  
6

7  
8 Alberta Health Services – Edmonton STI Clinic  
9

10  
11 3B20-11111 Jasper Ave  
12

13  
14 Edmonton, AB. T5K0L4  
15

16  
17 Email : ameeta@ualberta.ca  
18

19  
20 Phone : 780 342 2300 Fax : 780 425 2194  
21  
22  
23  
24  
25

26 **Word Count:** Abstract:280; Manuscript:3207; Tables: 3; Figures: 3; References: 32  
27  
28  
29  
30  
31  
32  
33  
34  
35  
36  
37  
38  
39  
40  
41  
42  
43  
44  
45  
46  
47  
48  
49  
50  
51  
52  
53  
54  
55  
56  
57  
58  
59  
60

## 1 **Abstract**

2 **Objectives:** To review the notification rate and characteristics of tertiary and neurosyphilis  
3 cases in Alberta, Canada in the post-antibiotic era.

4 **Methods:** A retrospective review of all neurosyphilis and tertiary syphilis cases reported in  
5 Alberta from 1973 to March 2017 was undertaken and cases classified into early neurosyphilis,  
6 late neurosyphilis and cardiovascular syphilis. Variables collected included demographics,  
7 sexual partners, HIV status, clinical parameters, symptoms and treatment and distributions  
8 were compared between early versus late neurosyphilis and asymptomatic versus symptomatic  
9 cases (stratified by early versus late stage). Data was analyzed using IBM SPSS Statistics Version  
10 19.0.

11 **Results:** 254 cases were identified; 251 were neurosyphilis and 3 were cardiovascular. No cases  
12 of gummatous syphilis were reported. Early neurosyphilis accounted for 52.4% (n=133) and  
13 46.1% (n=117) were late neurosyphilis cases; one (0.4%) case with unknown duration. Three  
14 outbreaks of infectious syphilis were identified during the study period and a concurrent rise in  
15 both early and late neurosyphilis was observed during the outbreak periods. The most  
16 common manifestation of symptomatic neurosyphilis was ocular involvement which was more  
17 likely in early neurosyphilis. Relative to late neurosyphilis cases, early neurosyphilis cases were  
18 more likely to be younger, Caucasian, born in Canada, HIV positive and reporting same sex  
19 partners while late neurosyphilis cases were more likely to be older, born outside of Canada  
20 and less likely to report same sex partners.

21 **Conclusions:** Our review of tertiary and neurosyphilis cases found that early and late  
22 neurosyphilis cases continue to occur in the context of cycling syphilis outbreaks.

1  
2  
3 23 Cardiovascular syphilis cases were extremely rare. Ongoing identification of new cases of  
4  
5 24 syphilis and clinical evaluation of cases for complications continues to be important in the  
6  
7  
8 25 context of global resurgence of syphilis.  
9

10 26

11 27

12  
13  
14  
15 28 **Keywords:** tertiary syphilis, neurosyphilis, Canada  
16  
17

18 29

19  
20 30 **Strengths and Limitations of this study:**  
21

- 22  
23 31 • An important strength of our study was the consistent reporting of all cases with positive  
24  
25 32 syphilis serology over the 44 year period by laboratories as well as active follow up of all cases  
26  
27 33 by the provincial STI program.  
28  
29 34 • Another strength of our study is the retrospective application of current case definitions to all  
30  
31 35 cases by 2 experienced STI clinicians.  
32  
33  
34 36 • One of the limitations to the retrospective review of data is the possibility of inaccurate  
35  
36 37 classification of cases due to insufficient available information.  
37  
38 38 • Additional study limitations include changes in testing policies and practices, as well as changes  
39  
40 39 in social norms over time.  
41  
42  
43 40 • Routine testing for HIV in cases of syphilis was also not conducted in earlier years and as such  
44  
45 41 the number of concurrent HIV infections may have been underestimated.  
46  
47  
48  
49  
50  
51  
52  
53  
54  
55  
56  
57  
58  
59  
60



1  
2  
3 46 **Manuscript**

4  
5  
6 47 **Background**

7  
8 48 Syphilis, caused by *Treponema pallidum* subspecies *pallidum*, passes through a series of stages,  
9  
10 49 including primary, secondary, latent, and tertiary syphilis if left untreated.<sup>1</sup> Based on data from  
11  
12  
13 50 the pre-antibiotic era, about a third of persons with untreated latent syphilis will develop late  
14  
15 51 neurosyphilis, cardiovascular syphilis or gummatous syphilis.<sup>2</sup> Gummatous syphilis is  
16  
17  
18 52 characterized by the development of indolent granulomatous lesions<sup>3</sup> which typically affect the  
19  
20 53 skin, liver, and bone but can also involve other parts of the body.<sup>4</sup> Syphilitic aortitis is the most  
21  
22  
23 54 common manifestation of cardiovascular syphilis and typically involves the ascending aorta.<sup>4-6</sup>  
24

25 55  
26  
27 56 Neurosyphilis can occur at any stage of syphilis.<sup>1,7</sup> It is classified into early and late forms.<sup>1</sup> Early  
28  
29  
30 57 neurosyphilis affects the cerebrospinal fluid (CSF), cerebral blood vessels, and meninges more  
31  
32  
33 58 often than the brain or spinal cord parenchyma. Typically, manifestations occur within weeks to  
34  
35 59 a few years after primary infection and may occur at the same time as primary or secondary  
36  
37  
38 60 syphilis, or may be asymptomatic. Manifestations may include meningitis with or without  
39  
40  
41 61 cranial nerve involvement, meningovascular disease or stroke. Late neurosyphilis can remain  
42  
43  
44 62 asymptomatic or progress to meningovascular syphilis, tabes dorsalis, or general paresis. Late  
45  
46  
47 63 neurosyphilis is extremely rare in the antibiotic era and usually occurs years to decades after  
48  
49  
50 64 primary infection.<sup>1,8</sup> HIV infection may affect the natural course of disease as atypical  
51  
52  
53 65 presentations and rapid progression of syphilis in HIV positive individuals has been reported.<sup>9-13</sup>  
54  
55  
56  
57  
58  
59  
60 66

1  
2  
3 67 In the pre-antibiotic era, an estimated one third of untreated persons developed tertiary  
4  
5 68 syphilis with about 15% progressing to gummatous disease (1-46 years post-infection), 10% to  
6  
7  
8 69 cardiovascular syphilis (20-30 years after infection), and 4-14% to late neurosyphilis (2-50 years  
9  
10 70 after infection).<sup>1</sup> After the introduction of penicillin in the 1940s, the number of cases of syphilis  
11  
12 71 plummeted in the United States, reaching a nadir in 2000.<sup>1</sup> Nowadays, tertiary syphilis is a rare  
13  
14 72 disease due to easy and effective treatment of infectious and latent syphilis. Antibiotic use for  
15  
16 73 other infections is also likely a factor.  
17  
18  
19  
20 74

21  
22 75 In Canada, syphilis (all stages) has been nationally notifiable since 1924. However national  
23  
24 76 reports only include data on infectious syphilis, since only these cases are of major public health  
25  
26 77 significance.<sup>14</sup> In Alberta, all cases of syphilis, including tertiary and neuro-syphilis have been  
27  
28 78 notifiable to a centralized program under the Public Health Act since 1921. Syphilis notification  
29  
30 79 rates have fluctuated over the last fifty years with a rise in notification rates during outbreak  
31  
32 80 periods. Since 2000, notification rates of infectious syphilis have increased dramatically in  
33  
34 81 Alberta (0.6/100,000 population in 2000 to 12.5/100,000 population in 2017), with the most  
35  
36 82 recent resurgence among men who have sex with men (MSM) and up to 30% of patients co-  
37  
38 83 infected with HIV (personal communication Jennifer Gratrix, Provincial STI Services, Alberta  
39  
40 84 Health Services).<sup>15</sup>  
41  
42  
43  
44  
45  
46  
47  
48  
49

50 86 There are few data on the prevalence and characteristics of tertiary and neuro-syphilis cases in  
51  
52 87 the post antibiotic era. We are aware of only one study from the Netherlands which estimated  
53  
54 88 that 10-13% of all syphilis cases from 1999-2010 had neurosyphilis; these data were limited by  
55  
56  
57  
58  
59  
60

89 the fact that the diagnostic criteria used for neurosyphilis was based on hospital discharge  
 90 diagnosis rather than clinical examination or laboratory criteria.<sup>16</sup> We sought to determine the  
 91 notification rate and characteristics of reported cases of tertiary and neurosyphilis in Alberta  
 92 from 1973 onwards.

## 94 **Methods**

95 A retrospective review was conducted of all tertiary and neurosyphilis cases in Alberta (current  
 96 population 4.3 million) from 1973 (when syphilis data was first available by staging) to March  
 97 2017 (most recent cases staged at time of data collection). All cases of syphilis are reportable by  
 98 laboratories and clinicians to Provincial STI Services under the Alberta Public Health Act. A  
 99 paper chart was created for each syphilis case containing laboratory results, medical  
 100 correspondence, syphilis-relevant history, clinical findings, and staging. Cases diagnosed since  
 101 2000 were also entered into a provincial surveillance database. Cases were classified as defined  
 102 in Table 1.<sup>17</sup>

104 Table 1: Case Definitions Used for Diagnosis of Neurosyphilis and Tertiary Syphilis (Adapted  
 105 from<sup>17</sup>:

| Syphilis stage    | Definition                                                                                                                                                                                                                                                     |
|-------------------|----------------------------------------------------------------------------------------------------------------------------------------------------------------------------------------------------------------------------------------------------------------|
| Tertiary syphilis | Reactive treponemal serology together with characteristic late abnormalities of the cardiovascular system, bone, skin or other structures, in the absence of other known causes of these abnormalities and no clinical or laboratory evidence of neurosyphilis |

|                                                                                               |                                                                                                                                                                                                                                                                                                                                                                                                                                  |
|-----------------------------------------------------------------------------------------------|----------------------------------------------------------------------------------------------------------------------------------------------------------------------------------------------------------------------------------------------------------------------------------------------------------------------------------------------------------------------------------------------------------------------------------|
| <p>Early Neurosyphilis<br/>(<br/>&lt; 1 year after<br/>infection)<br/><i>Asymptomatic</i></p> | <p>Laboratory confirmation of primary, second or early latent syphilis and</p> <ul style="list-style-type: none"> <li>i) reactive CSF-VDRL in non-bloody CSF</li> </ul> <p>AND/OR</p> <ul style="list-style-type: none"> <li>ii) elevated CSF leukocytes (&gt;5/micro) and/or elevated CSF protein (&gt;45 mg/dL) in the absence of other known causes</li> </ul> <p>AND</p> <p>NO signs or symptoms of neurosyphilis</p>        |
| <p>Early Neurosyphilis<br/>(<br/>&lt; 1 year after<br/>infection)<br/><i>Symptomatic</i></p>  | <p>Laboratory confirmation of primary, second or early latent syphilis and</p> <ul style="list-style-type: none"> <li>i) reactive CSF-VDRL in non-bloody CSF</li> </ul> <p>AND/OR</p> <ul style="list-style-type: none"> <li>ii) elevated CSF leukocytes (&gt;5/micro) and/or elevated CSF protein (&gt;45 mg/dL) in the absence of other known causes</li> </ul> <p>AND</p> <p>clinical signs or symptoms of neurosyphilis*</p> |
| <p>Late neurosyphilis<br/>(<br/>&gt;1 year after<br/>infection)<br/><i>Asymptomatic</i></p>   | <p>Reactive treponemal serology (not staged as primary, secondary or early latent syphilis) and</p> <ul style="list-style-type: none"> <li>i) reactive CSF-VDRL in non-bloody CSF</li> </ul> <p>AND/OR</p> <ul style="list-style-type: none"> <li>ii) elevated CSF leukocytes (&gt;5/micro) and/or elevated CSF protein (&gt;45 mg/dL) in the absence of other known causes</li> </ul>                                           |

|                                                                          |                                                                                                                                                                                                                                                                                                                                               |
|--------------------------------------------------------------------------|-----------------------------------------------------------------------------------------------------------------------------------------------------------------------------------------------------------------------------------------------------------------------------------------------------------------------------------------------|
|                                                                          | AND<br><br>NO clinical signs or symptoms of neurosyphilis                                                                                                                                                                                                                                                                                     |
| Late neurosyphilis<br>(>1 year after<br>infection)<br><i>Symptomatic</i> | Reactive treponemal serology (not staged as primary, secondary or early latent syphilis) and<br><br>iii) reactive CSF-VDRL in non-bloody CSF<br><br>AND/OR<br><br>iv) elevated CSF leukocytes (>5/micro) and/or elevated CSF protein (>45 mg/dL) in the absence of other known causes<br><br>AND clinical signs or symptoms of neurosyphilis* |

106

107 \*if ocular or otic signs or symptoms present with a normal CSF examination, patient was  
108 classified as symptomatic neurosyphilis (early or late)

109

110 Serological testing for syphilis changed during the study period, with reverse sequence syphilis  
111 screening (RSSS) using an enzyme immunoassay being introduced in September 2007; prior to  
112 this a quantitative Rapid Plasma Reagin (RPR) was used. Since the criteria for classifying  
113 neurosyphilis evolved over time, all neurosyphilis cases during the study period were reviewed  
114 by two STI physicians and classified into early asymptomatic, early symptomatic, late  
115 asymptomatic, late symptomatic neurosyphilis cases; disagreement between the classifications  
116 of cases was resolved by consensus between the two physicians (PS and AES).

1  
2  
3 117  
4  
5  
6 118 Reported notification rates of other stages of syphilis prior to 2000 were obtained from  
7  
8 119 historical surveillance reports from Alberta STI Services beginning in 1975. Population  
9  
10 120 denominators were obtained through government population estimates.<sup>18</sup> An outbreak was  
11  
12 121 defined as an increase in infectious syphilis cases of two standard deviations above the baseline  
13  
14  
15 122 for the given time period.

16  
17  
18 123  
19  
20 124 Variables collected for analysis included demographics, sexual partners, HIV status (testing  
21  
22 125 available since 1985<sup>19</sup> and recommended for all syphilis cases once serology available),  
23  
24  
25 126 diagnosis date, clinical parameters, symptoms, and treatment. Variables for cases diagnosed  
26  
27 127 prior to 2004 were captured through chart review, while variables for cases diagnosed after  
28  
29  
30 128 2004 were extracted from the provincial STI surveillance system. Client reported symptoms  
31  
32 129 were broken into five categories (not mutually exclusive) based on system involvement: ocular  
33  
34  
35 130 (e.g. uveitis, retinal, vision loss), auditory (e.g. hearing loss, tinnitus), ataxia, cognitive  
36  
37 131 impairment (e.g. dementia, psychosis), and other (aphasia, stroke, reduced level of  
38  
39  
40 132 consciousness, headache, and unspecified neurological symptoms).

41  
42 133  
43  
44  
45 134 Treatment data was divided into 3 mutually exclusive categories based on the following  
46  
47 135 minimum treatments: 1) penicillin G 3-4 million units IV q 4 h (18-24 million units/day) for 10 -  
48  
49 136 14 days, 2) ceftriaxone 2 g IV/IM daily x 10-14 days, 3) Other, which included drugs like  
50  
51  
52 137 chloramphenicol, doxycycline, tetracycline, benzathine penicillin G- long acting, reduced doses  
53  
54  
55 138 of penicillin G or ceftriaxone.

1  
2  
3 139  
4  
5  
6 140 Analysis was stratified by stage of syphilis to compare early and late neurosyphilis by the  
7  
8 141 previously listed variables using Chi-square or Fisher's exact for categorical variables and Mann-  
9  
10 142 Whitney tests for continuous variables. Missing data was categorized as unknown and included  
11  
12  
13 143 in the analysis. As well, each syphilis stage was stratified by asymptomatic and symptomatic for  
14  
15 144 comparison. The significance was set at a two-sided  $p$ -value of  $<0.05$ . A sensitivity analysis was  
16  
17  
18 145 conducted to determine if associations between early and late neurosyphilis were directionally  
19  
20 146 consistent over time by analyzing associations with gender, ethnicity, country of birth, and  
21  
22  
23 147 sexual partners by decades. Data was analyzed using IBM SPSS Statistics version 19.0 (IBM,  
24  
25 148 Armonk, NY, USA). This study was approved by the University of Alberta Health Research Ethics  
26  
27  
28 149 Board (Approval Number: Pro00075972).

150

### 151 ***Patient and Public Involvement***

152 Patients were not involved in the design of this research study.

153

### 154 **Results**

155 A total of 254 cases were identified during the study period, of which 251 were neurosyphilis  
156 and 3 were cardiovascular (CV) cases; one case of CV syphilis was reported in each of the  
157 following years: 1976, 1979, and 1984. No cases of gummatous syphilis were reported during  
158 this time period. The neurosyphilis cases were evenly divided as early (52.4%;  $n=133$ ) and late  
159 (46.1%;  $n=117$ ), with one additional case of unknown duration. Three individuals were  
160 diagnosed with two distinct episodes of neurosyphilis over the course of the reporting period.

1  
2  
3 161 All three of these individuals were men who reported same sex partners, all six episodes were  
4  
5 162 diagnosed between 2005 and 2014, and all categorized as early neurosyphilis. Two of these  
6  
7  
8 163 men were co-infected with HIV.  
9

10  
11 164  
12  
13 165 Between 1975 and 2016, 8,874 total cases of syphilis were reported in Alberta. Of these, 4,513  
14  
15 166 (51%) were infectious (i.e. staged as primary, secondary, early latent) and 4,361 (49%) were  
16  
17  
18 167 classified as non-infectious (i.e. late latent, tertiary). Over the time period, three outbreaks of  
19  
20 168 infectious syphilis were identified (Figure 1). The first outbreak occurred between 1981 and  
21  
22  
23 169 1987, the second outbreak commenced in 2000 and declined in 2011, and a third outbreak  
24  
25 170 began in 2015 and continues. Of the infectious syphilis cases, 2.8% (n=128) were staged as early  
26  
27  
28 171 neurosyphilis. When plotting the notification rate of early neurosyphilis cases, increases in the  
29  
30 172 rate were found at corresponding times to infectious syphilis outbreaks #2 and #3 (Figure 2). Of  
31  
32 173 the noninfectious syphilis cases staged during this time, 2.6% (115/4316) were staged with late  
33  
34  
35 174 neurosyphilis. Similarly, for late neurosyphilis, peaks in notification rates were found shortly  
36  
37 175 after outbreak #1 and outbreak #2 (Figure 2).  
38  
39

40 176 Early neurosyphilis cases were significantly younger, more likely to be Caucasian, born in  
41  
42 177 Canada, diagnosed in recent decades (2010's), reported same sex partners, and HIV positive as  
43  
44  
45 178 compared to late neurosyphilis cases (Table 2).  
46

47 179 Sensitivity analysis found similar directionally associations for gender, country of birth, and  
48  
49  
50 180 ethnicity for early neurosyphilis. Throughout the decades, cases reporting same sex partners  
51  
52 181 had the highest proportion of cases, except during the 2000's. Consistent directional  
53  
54  
55 182 associations were found for gender and sexual partners. During the 2000's, missing values for  
56  
57  
58  
59  
60



183 ethnicity and country of birth were the lowest, causing the other ethnicity and non-Canadian  
 184 born to their highest proportions during the 5 decades.

185 Table 2: Characteristics of Early and Late Neurosyphilis (Alberta, 1973 to March 2017; n=250)

|                         | Early Neurosyphilis |                     |               |         | Late Neurosyphilis  |                    |               |         | Comparison of Early and Late p-Value |
|-------------------------|---------------------|---------------------|---------------|---------|---------------------|--------------------|---------------|---------|--------------------------------------|
|                         | Asymptomatic (n=28) | Symptomatic (n=105) | Total (n=133) | p-Value | Asymptomatic (n=47) | Symptomatic (n=70) | Total (n=117) | p-Value |                                      |
| <b>Median Age (IQR)</b> | 40 (32-46)          | 47 (39-55)          | 44 (36-54)    | 0.02    | 45 (32-65)          | 64 (53-75)         | 58 (45-70)    | <0.001  | <0.001                               |
| <b>Gender</b>           |                     |                     |               |         |                     |                    |               |         |                                      |
| Female                  | 8 (28.6)            | 12 (11.4)           | 20 (15.0)     | 0.02    | 6 (12.8)            | 15 (21.4)          | 21 (17.9)     | 0.23    | 0.54                                 |
| Male                    | 20 (71.4)           | 93 (88.6)           | 113 (85.0)    |         | 41 (87.2)           | 55 (78.6)          | 96 (82.1)     |         |                                      |
| <b>Ethnicity</b>        |                     |                     |               |         |                     |                    |               |         |                                      |

|                          |           |              |                  |           |           |              |                  |      |        |
|--------------------------|-----------|--------------|------------------|-----------|-----------|--------------|------------------|------|--------|
| Indigeno<br>us           | 6 (21.4)  | 6 (5.7)      | 12<br>(9.0)      | 0.00<br>1 | 6 (12.8)  | 3 (4.3)      | 9<br>(7.7)       | 0.44 | <0.001 |
| Caucasia<br>n            | 10 (35.7) | 78<br>(74.3) | 88<br>(66.2<br>) |           | 14 (29.8) | 23<br>(32.9) | 37<br>(31.6<br>) |      |        |
| Other                    | 3 (10.7)  | 4 (3.8)      | 7<br>(5.3)       |           | 16 (34.0) | 27<br>(38.6) | 43<br>(36.8<br>) |      |        |
| Unknow<br>n              | 9 (32.1)  | 17<br>(16.2) | 26<br>(19.5<br>) |           | 11 (23.4) | 17<br>(24.3) | 28<br>(23.9<br>) |      |        |
| <b>Municip<br/>ality</b> |           |              |                  |           |           |              |                  |      |        |
| Calgary                  | 9 (32.1)  | 32<br>(30.5) | 41<br>(30.8<br>) | 0.62      | 10 (21.3) | 22<br>(31.4) | 32<br>(27.4<br>) | 0.46 | 0.59   |
| Edmont<br>on             | 15 (53.6) | 48<br>(45.7) | 63<br>(47.4<br>) |           | 28 (59.6) | 35<br>(50.0) | 63<br>(53.8<br>) |      |        |

|                                         |           |              |                  |           |           |              |                  |      |        |
|-----------------------------------------|-----------|--------------|------------------|-----------|-----------|--------------|------------------|------|--------|
| Other                                   | 4 (14.3)  | 25<br>(23.8) | 29<br>(21.8<br>) |           | 9 (19.1)  | 13<br>(18.6) | 22<br>(18.8<br>) |      |        |
| <b>Country<br/>of Birth</b>             |           |              |                  |           |           |              |                  |      |        |
| Canada                                  | 16 (57.1) | 56<br>(53.3) | 72<br>(54.1<br>) | 0.23      | 23 (48.9) | 16<br>(22.9) | 39<br>(33.3<br>) | 0.01 | <0.001 |
| Outside<br>of<br>Canada                 | 5 (17.9)  | 9 (8.6)      | 14<br>(10.5<br>) |           | 17 (36.2) | 36<br>(51.4) | 53<br>(45.3<br>) |      |        |
| Unknow<br>n                             | 7 (25.0)  | 40<br>(38.1) | 47<br>(35.3<br>) |           | 7 (14.9)  | 18<br>(25.7) | 25<br>(21.4<br>) |      |        |
| <b>Decade<br/>of<br/>Diagnos<br/>is</b> |           |              |                  |           |           |              |                  |      |        |
| 1970's                                  | 1 (3.6)   | 1 (1.0)      | 2<br>(1.5)       | 0.00<br>1 | 4 (8.5)   | 1 (1.4)      | 5<br>(4.3)       | 0.29 | <0.001 |

|                            |           |              |              |      |           |              |              |           |        |
|----------------------------|-----------|--------------|--------------|------|-----------|--------------|--------------|-----------|--------|
| 1980's                     | 6 (21.4)  | 3 (2.9)      | 9<br>(6.8)   |      | 13 (27.7) | 15<br>(21.4) | 28<br>(23.9) |           |        |
| 1990's                     | 3 (10.7)  | 5 (4.8)      | 8<br>(6.0)   |      | 6 (12.8)  | 9 (12.7)     | 15<br>(12.8) |           |        |
| 2000's                     | 8 (28.6)  | 28<br>(26.7) | 36<br>(27.1) |      | 4 (8.5)   | 20<br>(28.6) | 24<br>(20.5) |           |        |
| 2010's                     | 10 (35.7) | 68<br>(64.8) | 78<br>(58.6) |      | 20 (42.6) | 25<br>(35.7) | 45<br>(38.5) |           |        |
| <b>Sexual<br/>Partners</b> |           |              |              |      |           |              |              |           |        |
| heteros<br>exual           | 12 (42.9) | 46<br>(43.8) | 58<br>(43.6) | 1.00 | 30 (63.8) | 38<br>(54.3) | 68<br>(58.1) | 0.00<br>2 | <0.001 |
| Same<br>Sex                | 14 (50.0) | 52<br>(49.5) | 66<br>(49.6) |      | 11 (23.4) | 5 (7.1)      | 16<br>(13.7) |           |        |

|                       |           |              |               |            |           |              |              |            |        |
|-----------------------|-----------|--------------|---------------|------------|-----------|--------------|--------------|------------|--------|
| Unknow<br>n           | 2 (7.1)   | 7 (6.7)      | 9<br>(6.8)    |            | 6 (12.8)  | 27<br>(38.6) | 33<br>(28.2) |            |        |
| <b>HIV<br/>Status</b> |           |              |               |            |           |              |              |            |        |
| Negative              | 5 (17.9)  | 68<br>(64.8) | 73<br>(54.9)  | <0.0<br>01 | 19 (40.4) | 27<br>(38.6) | 46<br>(39.3) | 0.31       | <0.001 |
| Positive              | 17 (60.7) | 30<br>(28.6) | 47<br>(35.3)  |            | 8 (17.0)  | 6 (8.6)      | 14<br>(12.0) |            |        |
| Unknow<br>n           | 6 (21.4)  | 7 (6.7)      | 13<br>(9.8)   |            | 20 (42.6) | 37<br>(52.9) | 57<br>(48.7) |            |        |
| <b>Treatme<br/>nt</b> |           |              |               |            |           |              |              |            |        |
| Penicilli<br>n G      | 22 (78.6) | 82<br>(78.1) | 104<br>(78.2) | 0.87       | 21 (44.7) | 63<br>(90.0) | 84<br>(71.8) | <0.0<br>01 | 0.43   |

|             |          |           |           |  |           |         |           |  |  |
|-------------|----------|-----------|-----------|--|-----------|---------|-----------|--|--|
| Ceftriaxone | 3 (10.7) | 14 (13.3) | 17 (12.8) |  | 12 (25.5) | 5 (7.1) | 17 (14.5) |  |  |
| Other       | 3 (10.7) | 9 (8.6)   | 12 (9.0)  |  | 14 (29.8) | 2 (2.9) | 16 (13.7) |  |  |

186

187 Among early neurosyphilis cases, 79.0% (n=105) were symptomatic; symptomatic cases were  
 188 more likely to be older, male, Caucasian, recently diagnosed (2010's), and HIV negative  
 189 compared to asymptomatic cases. Among late neurosyphilis cases, 59.8% (n=70) were  
 190 symptomatic; symptomatic cases were more likely to be older, born outside of Canada, and  
 191 treated with intravenous penicillin G, and less likely to have a same sex partner as compared to  
 192 asymptomatic cases.

193

194 The majority (79.9%; n=139) of symptomatic cases reported a single manifestation. The most  
 195 common clinical manifestation of the symptomatic cases (41.1%; n=72) was ocular  
 196 involvement; early neurosyphilis cases were more likely to have ocular involvement than late  
 197 neurosyphilis cases (Table 3). The first case of ocular syphilis was reported in 1990 with the  
 198 majority (68.1%; n=49) of cases being diagnosed between 2010 and 2017. The second most  
 199 common (33.7%; n=59) manifestation of symptomatic neurosyphilis was cognitive impairment  
 200 with significantly more late neurosyphilis cases reporting these symptoms than early cases.  
 201 Twelve (6.9 %) cases reported auditory symptoms and 10.9% (n=19) reported ataxia. Nearly

202 one-third (29.7%; n=52) of cases reported other symptoms including aphasia, stroke, reduced  
 203 level of consciousness, headache, and unspecified neurological symptoms..

204 Table 3: Manifestations of Early and Late Symptomatic Neurosyphilis (Alberta, 1973 to March  
 205 2017; n=175)

| Manifestation        | Early Neurosyphilis<br>(n=105) | Late Neurosyphilis<br>(n=70) | P-Value |
|----------------------|--------------------------------|------------------------------|---------|
| Ocular               | 59 (56.2)                      | 13 (18.6)                    | <0.001  |
| Cognitive Impairment | 20 (19.0)                      | 39 (55.7)                    | <0.001  |
| Ataxia               | 9 (8.6)                        | 10 (14.3)                    | 0.23    |
| Auditory             | 10 (9.5)                       | 2 (2.9)                      | 0.13    |
| Other*               | 30 (28.6)                      | 22 (31.4)                    | 0.69    |

206 • \*Aphasia, reduced level of consciousness, headache, unspecified neurological symptoms

207 Although the first HIV co-infected case was reported in 1986, over one-half (57.4%; n=35) of  
 208 HIV co-infected cases were reported between 2010 and 2017. The majority (62.2%; n= 46) of  
 209 cases with an unknown HIV status occurred between the 1970's and 1980's, prior to the clinical  
 210 availability of diagnostic serology. Cases that had HIV test results were significantly younger (47  
 211 years; IQR: 37-55) than cases without HIV test results (64 years; IQR: 44-70; p<0.001).

212  
 213 Thirty-six (14.2%) of all the cases were diagnosed without a lumbar puncture result. Nearly all  
 214 of these clinical cases (97.2%; n=35) were symptomatic. The remaining asymptomatic case was  
 215 diagnosed based on an inadequate fall in RPR titres over time. There was no significant  
 216 difference by HIV status for those who had and did not have a lumbar puncture (p=0.62).

1  
2  
3 217 Clinical parameters by HIV status are outlined in Figure 3. Of the 2 HIV-positive and 6 HIV-  
4  
5  
6 218 negative cases with negative clinical parameters, all were symptomatic cases.  
7  
8 219  
9  
10 220 The majority (74.4%; n=189) of all cases were treated with intravenous penicillin G.  
11  
12  
13 221 Asymptomatic late neurosyphilis cases were less likely to be treated with penicillin G (44.7%;  
14  
15 222 n=21) as compared to symptomatic late neurosyphilis (90.0%; n=63; p<0.001). There was a rise  
16  
17  
18 223 in the use of ceftriaxone in late neurosyphilis treatment from no use in the 1970's to 1990's, to  
19  
20 224 12.5% (n=3) in 2000's and 31.1% (n=14) in the 2010's. Other drug combinations for  
21  
22  
23 225 neurosyphilis was highest in the 1970's (85.7%; n=6) and dropped to a low of 4.3% (n=1) in the  
24  
25 226 1990's.  
26  
27  
28 227  
29

## 30 228 **Discussion**

31  
32 229 A review of the trends in reported cases of infectious syphilis from 1975 to March, 2017 in  
33  
34  
35 230 Alberta shows a cycling in the number of cases over time. During this time period, the first  
36  
37 231 major outbreak of infectious syphilis occurred between 1981 and 1987, with the majority of  
38  
39  
40 232 cases between 1983 and 1985.<sup>20</sup> A quiescent period of approximately two decades followed  
41  
42 233 with a resurgence in infectious cases in 2000 followed by a decline in 2011 and then another  
43  
44  
45 234 rise in 2015. These observations are consistent with a study of long term trends in reported  
46  
47 235 primary and secondary syphilis cases in the United States which showed recurrent peaks and  
48  
49  
50 236 troughs in approximately 10-year cycles.<sup>21</sup> This pattern of periodic resurgence of syphilis has  
51  
52 237 variously been attributed to either failure to sustain control efforts, changing risk behaviours  
53  
54  
55 238 (such as crack cocaine use), and waxing and waning partial host immunity to infection at the  
56  
57  
58  
59  
60



1  
2  
3 239 population level.<sup>22,23</sup> Interestingly, our province observed a 20-year gap between the outbreak  
4  
5 240 in the mid 1980s and the mid 2000s. The reasons for this prolonged gap are unclear but are  
6  
7  
8 241 likely multi-factorial including a well-established and sustained prevention and control program  
9  
10 242 for STIs in the province, emergence of HIV and the mass education that occurred during this  
11  
12  
13 243 time period. This theory is supported by declining notification rates of gonorrhoea and chlamydia  
14  
15 244 until 1998 and then subsequent rises to current rates.<sup>24</sup> Our observed rising notification rates of  
16  
17  
18 245 infectious syphilis since the mid-2000s are consistent with many jurisdictions across Canada and  
19  
20 246 the United States.<sup>14,25</sup> The rise in late latent syphilis in 2007 has been attributed to the  
21  
22  
23 247 introduction of RSSS.<sup>26</sup>  
24  
25 248  
26  
27 249 Some studies have reported a rise in cases of neurosyphilis related to outbreaks of infectious  
28  
29  
30 250 syphilis. One possible explanation for this is that the overall rise in notification rates of  
31  
32  
33 251 infectious syphilis could potentially increase the pool of persons progressing to neurosyphilis  
34  
35 252 and tertiary syphilis. For example, a study conducted in British Columbia, one of Alberta's  
36  
37  
38 253 neighboring provinces, reported that in the context of rising rates of infectious syphilis, the  
39  
40 254 neurosyphilis rate was 0.03 per 100,000 in 1992 and increased 27-fold to 0.8 per 100,000 in  
41  
42 255 2012.<sup>27</sup> Investigators from Guangdong province in China similarly reported an incidence rate  
43  
44  
45 256 increase in neurosyphilis cases from 0.21 cases per 100,000 persons in 2009 to 0.31 cases per  
46  
47 257 100,000 persons in 2014 and in tertiary cases from 0.28 cases per 100,000 persons in 2009 to  
48  
49  
50 258 0.36 cases per 100,000 persons in 2014.<sup>28</sup> Neither of these studies, however, distinguished  
51  
52 259 between early and late neurosyphilis cases. In our review, we observed a significant rise in early  
53  
54  
55 260 neurosyphilis during the outbreak periods and a significant decline after the outbreak periods,  
56  
57  
58  
59  
60

1  
2  
3 261 e.g. only one case was observed in 2012 after the second outbreak. We had expected to see a  
4  
5  
6 262 sustained increase in late neurosyphilis cases based on the hypothesis that the number of  
7  
8 263 untreated infected persons with syphilis would increase over time but there was no significant  
9  
10 264 increase during the overall observation period. Interestingly, a rise in late neurosyphilis cases  
11  
12  
13 265 was observed towards the end of the outbreak periods, perhaps due to heightened awareness  
14  
15 266 and increased testing due to public health announcements during the outbreak periods and  
16  
17 267 also because late (tertiary) neurosyphilis can occur as soon as two years post-infection.<sup>1</sup>  
18  
19  
20 268 Although individuals diagnosed with late symptomatic neurosyphilis are not infectious and  
21  
22  
23 269 therefore not of concern from a public health perspective, these individuals would benefit from  
24  
25 270 screening and appropriate treatment for syphilis to prevent complications of tertiary syphilis.<sup>1</sup>  
26

27  
28 271  
29  
30 272 Early neurosyphilis cases were more likely to be younger, Caucasian, born in Canada, HIV  
31  
32 273 positive and reporting same sex partners. These observations parallel the observed rise in  
33  
34 274 infectious syphilis during the third outbreak and may also be related to selection bias since  
35  
36 275 lumbar punctures were more likely to be performed in HIV positive persons in the early years,  
37  
38 276 especially those with low CD<sub>4</sub> counts (<350) and/or RPR  $\geq$  1:32 dilutions as recommended in the  
39  
40 277 Canadian STI Guidelines.<sup>29</sup> In addition, most clinicians providing care to HIV positive individuals  
41  
42  
43 278 in Alberta would have offered regular syphilis screening in HIV positive individuals, as endorsed  
44  
45 279 for several years in the U.S. Department of Health and Human Services guidelines.<sup>30</sup>  
46  
47  
48  
49

50 280  
51  
52 281 The most common manifestation (40%) of symptomatic neurosyphilis was ocular involvement  
53  
54 282 with cases of early neurosyphilis more likely than cases of late neurosyphilis to have ocular  
55  
56  
57  
58  
59  
60

1  
2  
3 283 involvement (54% vs 17%,  $p < 0.001$ ). Two-thirds of ocular cases were reported between 2010  
4  
5 284 and 2017, with 46.4% reported among MSM, similar to other studies.<sup>31</sup> Late neurosyphilis cases  
6  
7  
8 285 were more likely to be older, born outside of Canada and less likely to report same sex  
9  
10 286 partners, paralleling the demographics of late latent cases of syphilis in our province (data not  
11  
12  
13 287 shown).

14  
15 288  
16  
17 289 Our study identified very few ( $n=3$ ) cardiovascular cases of tertiary syphilis with all cases  
18  
19 290 identified at the time of a diagnosis of aortic aneurysm. This likely represents an underestimate  
20  
21 291 in the actual number of cases of CV syphilis as we suspect that most patients with aortic  
22  
23 292 aneurysm or initial cardiovascular involvement do not have syphilis testing performed. In  
24  
25 293 Alberta, the provincial STI program facilitates the assessment of all late stage syphilis cases by a  
26  
27 294 physician who then conducts a neurological and cardiovascular examination. A chest  
28  
29  
30 295 radiograph, recommended in the past in some jurisdictions to look for linear calcification of the  
31  
32 296 ascending aorta, a radiological sign of syphilitic aortitis is not routinely done. Chest radiographs  
33  
34 297 for the evaluation of CV syphilis in asymptomatic patients with LLS is of such low yield, that it is  
35  
36 298 not routinely recommended.<sup>32</sup> Neither clinical examination nor chest radiograph is likely to be  
37  
38 299 sensitive enough to identify cases of CV syphilis and given the presumed rarity of this condition  
39  
40 300 and that the treatment is the same as for LLS, further evaluations (e.g. echocardiograms) are  
41  
42 301 not warranted.

43 302  
44  
45 303 No cases of gummatous syphilis were reported during our study period. Although syphilitic  
46  
47 304 gummas were reported in up to 15% cases in the pre-antibiotic era, it is possible that the  
48  
49  
50  
51  
52  
53  
54  
55  
56  
57  
58  
59  
60

1  
2  
3 305 widespread use of antibiotics for other conditions, which may indirectly treat or partially treat  
4  
5 306 syphilis, has affected the occurrence.  
6  
7

8 307  
9  
10 308 One of the strengths of our study is that there was consistent reporting of all cases with  
11  
12 309 positive syphilis serology over time by laboratories and active follow up by the provincial STI  
13  
14 310 program with health care providers. We were able to apply current case definitions  
15  
16 311 retrospectively to all cases; however, one of the limitations to retrospective review of data is  
17  
18 312 the possibility of inaccurate classification of cases. Our review by two experienced medical  
19  
20 313 consultants resulted in only one case where insufficient information was available to classify  
21  
22 314 the case with reasonable accuracy. Additional study limitations include changes in and quality  
23  
24 315 of data collection practices over time, with improved data quality over time. The information  
25  
26 316 about gender of sex partners may have been inaccurate in earlier years due to stigma  
27  
28 317 associated with same sex partners. Routine testing for HIV in cases of syphilis was also not  
29  
30 318 conducted in earlier years and as such the number of concurrent HIV infections may be  
31  
32 319 underestimated.  
33  
34  
35  
36  
37  
38  
39

40 320  
41  
42 321 In summary, our review of tertiary and neurosyphilis cases in Alberta over a 44-year period  
43  
44 322 found that early and late neurosyphilis cases continue to occur in the context of cycling of  
45  
46 323 infectious syphilis outbreaks. Ocular disease was the most common manifestation of  
47  
48 324 neurosyphilis in our study. On the other hand, cardiovascular syphilis was extremely rare and  
49  
50 325 no cases of gumma were identified. Ongoing identification of syphilis cases with prompt  
51  
52  
53  
54  
55  
56  
57  
58  
59  
60

1  
2  
3 326 treatment and follow up continues to be important in the context of resurgence of infectious  
4  
5  
6 327 syphilis worldwide.

7  
8 328

9  
10 329 **Author contributions:** TL reviewed hard copy records of all cases and conducted data entry into  
11  
12  
13 330 an Excel file; PS and AS reviewed and re-classified all cases; JG conducted data analysis; JG and  
14  
15 331 AS drafted initial versions of the manuscript; TL, PS, RC, JG, LB, RR, BR and AES helped develop  
16  
17  
18 332 the study design and reviewed drafts of the manuscript.

19  
20 333

21  
22 334

23  
24 335

25  
26 336

27  
28 337

29  
30 338

31  
32 339

33  
34 340

35  
36 341

37  
38 342

39  
40 343

41  
42 344

43  
44 345

45  
46 346

47  
48 347

348 **References**

- 349 1. Golden MR, Marra CM, Holmes KK. Update on syphilis: resurgence of an old problem.  
350 *JAMA* 2003; 290: 1510-4.
- 351 2. Gjestland T. The Oslo study of untreated syphilis: An epidemiologic investigation of the  
352 natural course of syphilitic infection based on a restudy of the Boeck-Bruusgaard  
353 material. *J Chronic Dis* 1955; 2: 311-44.
- 354 3. Kent ME, Romanelli F. Examining syphilis: an update on epidemiology, clinical  
355 manifestations, and management. *Annals of Pharmacotherapy* 2008: 226-36.
- 356 4. Kampmeier RH. The late manifestations of syphilis: skeletal, visceral and cardiovascular.  
357 *Med Clin North Am* 1964; 48:667-697.
- 358 5. Cole HN. Cooperative clinical studies in the treatment of syphilis. The effect of specific  
359 therapy on the prophylaxis and progress of cardiovascular syphilis. *JAMA* 1937;  
360 108:1861-1866.
- 361 6. Howles JK. *Synopsis of clinical syphilis*. St. Louis, MO: Mosby Co, 1943.
- 362 7. Marra CM. Neurosyphilis. *Continuum (Minneapolis)* 2015;21:1714-28.
- 363 8. Merritt HH. *Neurosyphilis*. New York, NY: Oxford University Press, 1946.
- 364 9. Berry CD. Neurologic relapse after benzathine penicillin therapy for secondary syphilis in  
365 a patient with HIV infection. *N Engl J Med* 1987;316:1587-15.
- 366 10. Johns DR. Alteration in the natural history of neurosyphilis by concurrent infection with  
367 the human immunodeficiency virus. *N Engl J Med* 1987;316:1569-1572.
- 368 11. Rolfs RT. A randomized trial of enhanced therapy for early syphilis in patients with or  
369 without human immunodeficiency virus infection. *N Engl J Med* 1997;337:307-314.

- 1  
2  
3 370 12. Lukehart SA, Hook EW III, Baker-Zander SA, *et al.* Invasion of the central nervous system  
4  
5  
6 371 by *Treponema pallidum*: implications for diagnosis and treatment. *Ann Intern Med* 1988;  
7  
8 372 109: 855–62.  
9  
10 373 13. Musher DM. Effect of human immunodeficiency virus (HIV) infection on the course of  
11  
12 374 syphilis and on the response to treatment. *Ann Intern Med* 1990;113:872-881.  
13  
14 375 14. Public Health Agency of Canada. Report on Sexually Transmitted Infections in Canada:  
15  
16 376 2013-2014. [https://www.canada.ca/en/public-health/services/publications/diseases-](https://www.canada.ca/en/public-health/services/publications/diseases-conditions/report-sexually-transmitted-infections-canada-2013-14.html#a41)  
17  
18 377 [conditions/report-sexually-transmitted-infections-canada-2013-14.html#a41](https://www.canada.ca/en/public-health/services/publications/diseases-conditions/report-sexually-transmitted-infections-canada-2013-14.html#a41) (accessed  
19  
20 378 27 March 2018).  
21  
22 379 15. Government of Alberta. Interactive Health Data Application. STI-Age-Sex Specific  
23  
24 380 Incidence Rate.  
25  
26 381 [http://www.ahw.gov.ab.ca/IHDA\\_Retrieval/redirectToURL.do?cat=81&subCat=466](http://www.ahw.gov.ab.ca/IHDA_Retrieval/redirectToURL.do?cat=81&subCat=466)  
27  
28 382 (accessed on 12 June 2018).  
29  
30 383 16. Daey Ouwens IM, Koedijk FD, Fiolet AT, *et al.* Neurosyphilis in the mixed urban-rural  
31  
32 384 community of the Netherlands. *Acta neuropsychiatrica* 2014;26:186-192.  
33  
34 385 17. Government of Alberta Public Health Notifiable Disease Management Guidelines:  
35  
36 386 Syphilis July 2012. [https://open.alberta.ca/dataset/e234483d-fc2d-4bbf-a248-](https://open.alberta.ca/dataset/e234483d-fc2d-4bbf-a248-e0442808187e/resource/244eacc-c0ac-4933-9347-a908cbbc45f0/download/Guidelines-Syphilis-2012.pdf)  
37  
38 387 [e0442808187e/resource/244eacc-c0ac-4933-9347-](https://open.alberta.ca/dataset/e234483d-fc2d-4bbf-a248-e0442808187e/resource/244eacc-c0ac-4933-9347-a908cbbc45f0/download/Guidelines-Syphilis-2012.pdf)  
39  
40 388 [a908cbbc45f0/download/Guidelines-Syphilis-2012.pdf](https://open.alberta.ca/dataset/e234483d-fc2d-4bbf-a248-e0442808187e/resource/244eacc-c0ac-4933-9347-a908cbbc45f0/download/Guidelines-Syphilis-2012.pdf) (accessed 26 April 2018).  
41  
42 389 18. Government of Alberta. Interactive Health Data Application. Population Estimates.  
43  
44 390 [http://www.ahw.gov.ab.ca/IHDA\\_Retrieval/redirectToURL.do?cat=5&subCat=63](http://www.ahw.gov.ab.ca/IHDA_Retrieval/redirectToURL.do?cat=5&subCat=63)  
45  
46 391 (accessed on 1 June 2018).  
47  
48  
49  
50  
51  
52  
53  
54  
55  
56  
57  
58  
59  
60

- 1  
2  
3 392 19. Government of Alberta Public Health Notifiable Disease Management Guidelines:  
4  
5  
6 393 Human Immunodeficiency Virus (HIV), January 2011.  
7  
8 394 <https://open.alberta.ca/publications/human-immunodeficiency-virus-hiv> (accessed 24  
9  
10 395 July 2018).
- 11  
12  
13 396 20. Romanowski B, Sutherland R, Love EJ, Mooney D. Epidemiology of an outbreak of  
14  
15  
16 397 infectious syphilis in Alberta. *Int J STD AIDS* 1991;2:424-7.
- 17  
18 398 21. Nakashima AK, Rolfs RT, Flock ML, *et al.* Epidemiology of syphilis in the United States,  
19  
20  
21 399 1941--1993. *Sex Transm Dis* 1996;23:16-23.
- 22  
23 400 22. Grassly NC, Fraser C, Garnett GP. Host immunity and synchronized epidemics of syphilis  
24  
25  
26 401 across the United States. *Nature* 2005; 433: 417–21.
- 27  
28 402 23. Grenfell B, Bjornstad O. Epidemic cycling and immunity. *Nature* 2005;433:366-7.
- 29  
30  
31 403 24. Alberta Health and Wellness. Sexually Transmitted Infections Surveillance Report:  
32  
33 404 Alberta – 1998 to 2002. [https://open.alberta.ca/dataset/262e0d89-1fbe-4120-b521-](https://open.alberta.ca/dataset/262e0d89-1fbe-4120-b521-d0b586caea0b/resource/e2fd112f-7d7d-4f2e-accb-8afd38af4dba/download/sti-surveillance-2002.pdf)  
34  
35 405 [d0b586caea0b/resource/e2fd112f-7d7d-4f2e-accb-8afd38af4dba/download/sti-](https://open.alberta.ca/dataset/262e0d89-1fbe-4120-b521-d0b586caea0b/resource/e2fd112f-7d7d-4f2e-accb-8afd38af4dba/download/sti-surveillance-2002.pdf)  
36  
37 406 [surveillance-2002.pdf](https://open.alberta.ca/dataset/262e0d89-1fbe-4120-b521-d0b586caea0b/resource/e2fd112f-7d7d-4f2e-accb-8afd38af4dba/download/sti-surveillance-2002.pdf). Accessed March 13, 2019.
- 38  
39  
40  
41 407 25. Patton ME, Su JR, Nelson R, Weinstock H; Centers for Disease Control and Prevention  
42  
43  
44 408 (CDC). Primary and secondary syphilis--United States, 2005-2013.  
45  
46 409 *MMWR Morb Mortal Wkly Rep* 2014;63:402-6.
- 47  
48 410 26. Gratrix J, Plitt S, Lee BE, *et al.* Impact of Reverse Sequence Syphilis Screening on New  
49  
50  
51 411 Diagnoses of Late Latent Syphilis in Edmonton, Canada. *Sex Transm Dis* 2012;39:528-30.
- 52  
53 412 27. Lester RT, Morshed M, Gilbert M, Hottes T. Syphilis and neurosyphilis increase to  
54  
55  
56 413 historic levels in BC. *BC Med* 2013; 55: 204-5.
- 57  
58  
59  
60



- 1  
2  
3 414 28. Tang W, Huang S, Chen L, *et al.* Late Neurosyphilis and Tertiary Syphilis in Guangdong  
4  
5 Province, China: Results from a Cross-sectional Study. *Sci Rep* 2017;7:45339.  
6 415  
7  
8 416 29. Public Health Agency of Canada. Canadian Guidelines on Sexually Transmitted  
9  
10 Infections-Management and treatment of specific infections-Syphilis.  
11 417  
12 [http://stacks.cdc.gov/view/cdc/26062](https://www.canada.ca/en/public-health/services/infectious-diseases/sexual-health-<br/>13 418 <u>sexually-transmitted-infections/canadian-guidelines/sexually-transmitted-<br/>14 <u>sexually-transmitted-infections/canadian-guidelines/sexually-transmitted-<br/>15 419 <u>infections/canadian-guidelines-sexually-transmitted-infections-27.html</u> (accessed 11<br/>16 <u>infections/canadian-guidelines-sexually-transmitted-infections-27.html</u> (accessed 11<br/>17<br/>18 420<br/>19 July 2018)).<br/>20 421<br/>21<br/>22 422 30. Centers for Disease Control and Prevention, Health Resources and Services<br/>23<br/>24 Administration, National Institutes of Health, American Academy of HIV Medicine,<br/>25 423<br/>26 Association of Nurses in AIDS Care, International Association of Providers of AIDS Care,<br/>27 424<br/>28 the National Minority AIDS Council, and Urban Coalition for HIV/AIDS Prevention<br/>29 425<br/>30 Services. Recommendations for HIV Prevention with Adults and Adolescents with HIV in<br/>31 426<br/>32 the United States, 2014. <a href=) (accessed March 10,  
33 427  
34 2019).  
35 428  
36  
37 429 31. Oliver SE, Aubin M, Atwell L, *et al.* Ocular Syphilis - Eight Jurisdictions, United States,  
38 430  
39 2014-2015. *MMWR Morb Mortal Wkly Rep* 2016;65:1185-1188.  
40 431  
41  
42 432 32. Dabis R, Radcliffe K. Is it useful to perform chest x-ray in asymptomatic patients with  
43  
44 late latent syphilis. *Int J STD AIDS* 2011;22:105-6.  
45 433  
46  
47 434  
48  
49 435  
50  
51  
52  
53  
54  
55  
56  
57  
58  
59  
60

1  
2  
3 436 Figure 1. Rate per 100,000 Population of Syphilis by Type and Diagnosis Year (Alberta, Canada,  
4  
5  
6 437 1975-2016)

7  
8 438  
9

10 439 Figure 2. Rates of Early and Late Neurosyphilis during 2 Different Outbreak Periods with Linear  
11  
12  
13 440 Trend Line (Alberta, 1975-2016)

14  
15 441

16  
17  
18 442 Figure 3: Algorithm of diagnosis of neurosyphilis among HIV-positive and HIV-negative cases  
19  
20 443 (Alberta, 1975-March 2017)

21  
22 444  
23  
24  
25 445  
26  
27 446  
28  
29  
30  
31  
32  
33  
34  
35  
36  
37  
38  
39  
40  
41  
42  
43  
44  
45  
46  
47  
48  
49  
50  
51  
52  
53  
54  
55  
56  
57  
58  
59  
60

1  
2  
3  
4  
5  
6  
7  
8  
9  
10  
11  
12  
13  
14  
15  
16  
17  
18  
19  
20  
21  
22  
23  
24  
25  
26  
27  
28  
29  
30  
31  
32  
33  
34  
35  
36  
37  
38  
39  
40  
41  
42  
43  
44  
45  
46  
47  
48  
49  
50  
51  
52  
53  
54  
55  
56  
57  
58  
59  
60

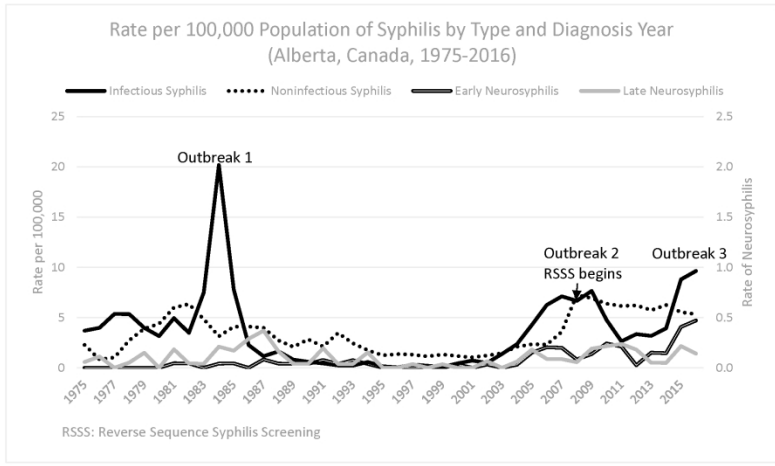

Figure 1. Rate per 100,000 Population of Syphilis by Type and Diagnosis Year (Alberta, Canada, 1975-2016)

215x279mm (300 x 300 DPI)

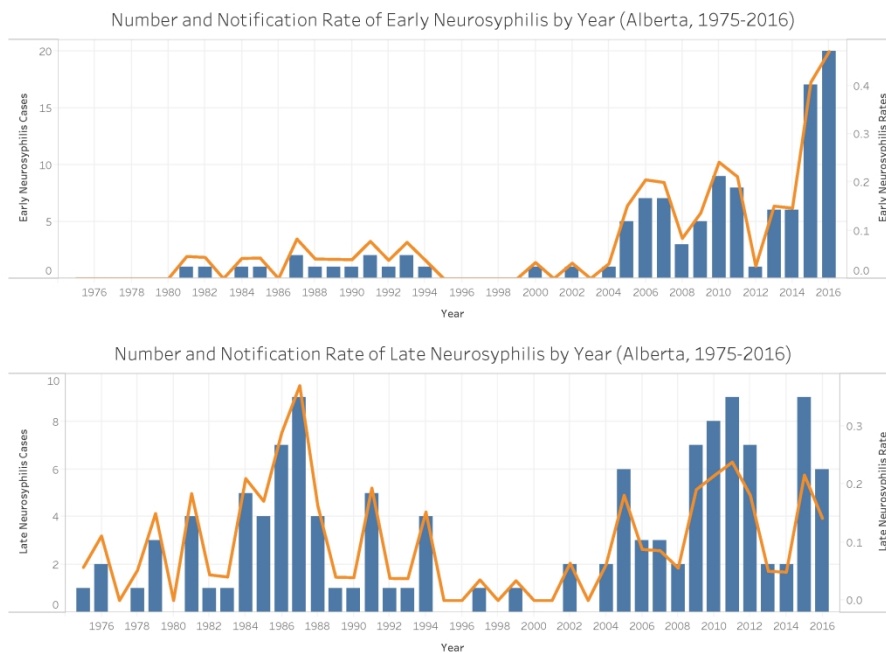

Figure 2. Rates of Early and Late Neurosyphilis during 2 Different Outbreak Periods with Linear Trend Line (Alberta, 1975-2016)

279x215mm (300 x 300 DPI)

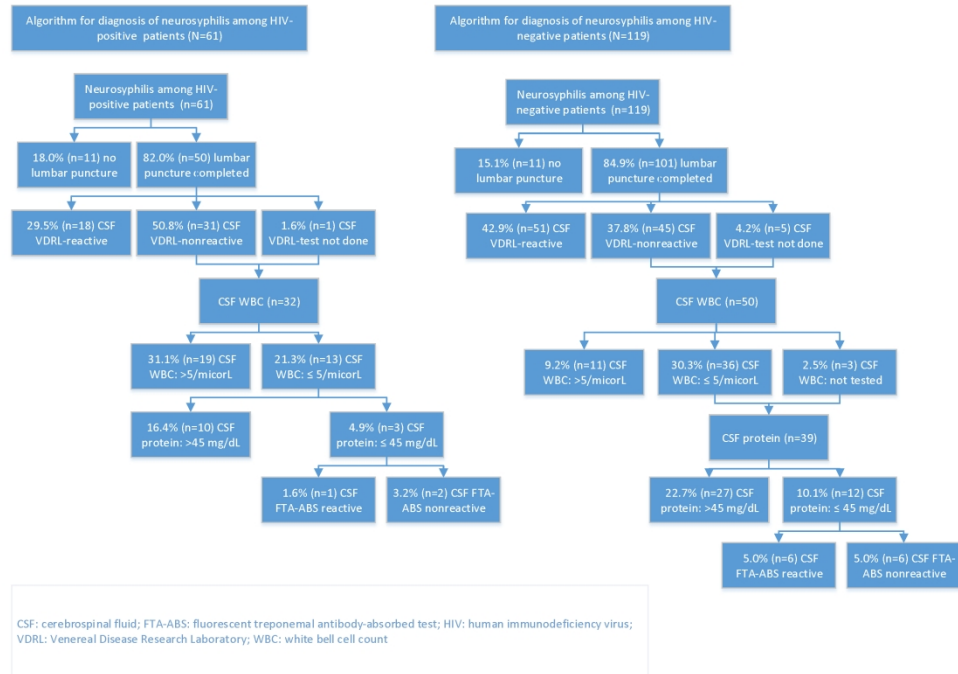

Figure 3: Algorithm of diagnosis of neurosyphilis among HIV-positive and HIV-negative cases (Alberta, 1975-March 2017)

279x215mm (300 x 300 DPI)

STROBE Statement—Checklist of items that should be included in reports of *cross-sectional studies*

|                              | <b>Item No</b> | <b>Recommendation</b>                                                                                                                                                                                        | <b>Reported on page #</b> |
|------------------------------|----------------|--------------------------------------------------------------------------------------------------------------------------------------------------------------------------------------------------------------|---------------------------|
| <b>Title and abstract</b>    | 1              | (a) Indicate the study's design with a commonly used term in the title or the abstract                                                                                                                       | 1                         |
|                              |                | (b) Provide in the abstract an informative and balanced summary of what was done and what was found                                                                                                          | 2                         |
| <b>Introduction</b>          |                |                                                                                                                                                                                                              |                           |
| Background/rationale         | 2              | Explain the scientific background and rationale for the investigation being reported                                                                                                                         | 4-5                       |
| Objectives                   | 3              | State specific objectives, including any prespecified hypotheses                                                                                                                                             | 5-6                       |
| <b>Methods</b>               |                |                                                                                                                                                                                                              |                           |
| Study design                 | 4              | Present key elements of study design early in the paper                                                                                                                                                      | 6                         |
| Setting                      | 5              | Describe the setting, locations, and relevant dates, including periods of recruitment, exposure, follow-up, and data collection                                                                              | 6                         |
| Participants                 | 6              | (a) Give the eligibility criteria, and the sources and methods of selection of participants                                                                                                                  | 6                         |
| Variables                    | 7              | Clearly define all outcomes, exposures, predictors, potential confounders, and effect modifiers. Give diagnostic criteria, if applicable                                                                     | 6-7                       |
| Data sources/<br>measurement | 8*             | For each variable of interest, give sources of data and details of methods of assessment (measurement). Describe comparability of assessment methods if there is more than one group                         | 7                         |
| Bias                         | 9              | Describe any efforts to address potential sources of bias                                                                                                                                                    | 6                         |
| Study size                   | 10             | Explain how the study size was arrived at                                                                                                                                                                    | 6                         |
| Quantitative<br>variables    | 11             | Explain how quantitative variables were handled in the analyses. If applicable, describe which groupings were chosen and why                                                                                 | 7                         |
| Statistical methods          | 12             | (a) Describe all statistical methods, including those used to control for confounding                                                                                                                        | 7                         |
|                              |                | (b) Describe any methods used to examine subgroups and interactions                                                                                                                                          | N/A                       |
|                              |                | (c) Explain how missing data were addressed                                                                                                                                                                  | 7                         |
|                              |                | (d) If applicable, describe analytical methods taking account of sampling strategy                                                                                                                           | N/A                       |
|                              |                | (e) Describe any sensitivity analyses                                                                                                                                                                        | N/A                       |
| <b>Results</b>               |                |                                                                                                                                                                                                              |                           |
| Participants                 | 13*            | (a) Report numbers of individuals at each stage of study—eg numbers potentially eligible, examined for eligibility, confirmed eligible, included in the study, completing follow-up, and analysed            | 7-8                       |
|                              |                | (b) Give reasons for non-participation at each stage                                                                                                                                                         | N/A                       |
|                              |                | (c) Consider use of a flow diagram                                                                                                                                                                           | N/A                       |
| Descriptive data             | 14*            | (a) Give characteristics of study participants (eg demographic, clinical, social) and information on exposures and potential confounders                                                                     | Table 2                   |
|                              |                | (b) Indicate number of participants with missing data for each variable of interest                                                                                                                          | Table 2                   |
| Outcome data                 | 15*            | Report numbers of outcome events or summary measures                                                                                                                                                         | 8                         |
| Main results                 | 16             | (a) Give unadjusted estimates and, if applicable, confounder-adjusted estimates and their precision (eg, 95% confidence interval). Make clear which confounders were adjusted for and why they were included |                           |

|                          |    |                                                                                                                                                                            |                 |
|--------------------------|----|----------------------------------------------------------------------------------------------------------------------------------------------------------------------------|-----------------|
|                          |    | (b) Report category boundaries when continuous variables were categorized                                                                                                  | Table 2         |
|                          |    | (c) If relevant, consider translating estimates of relative risk into absolute risk for a meaningful time period                                                           | N/A             |
| Other analyses           | 17 | Report other analyses done—eg analyses of subgroups and interactions, and sensitivity analyses                                                                             | Figure 2<br>8-9 |
| <b>Discussion</b>        |    |                                                                                                                                                                            |                 |
| Key results              | 18 | Summarise key results with reference to study objectives                                                                                                                   | 11-12           |
| Limitations              | 19 | Discuss limitations of the study, taking into account sources of potential bias or imprecision. Discuss both direction and magnitude of any potential bias                 | 14              |
| Interpretation           | 20 | Give a cautious overall interpretation of results considering objectives, limitations, multiplicity of analyses, results from similar studies, and other relevant evidence | 15              |
| Generalisability         | 21 | Discuss the generalisability (external validity) of the study results                                                                                                      | 15              |
| <b>Other information</b> |    |                                                                                                                                                                            |                 |
| Funding                  | 22 | Give the source of funding and the role of the funders for the present study and, if applicable, for the original study on which the present article is based              | 3               |

\*Give information separately for exposed and unexposed groups.

**Note:** An Explanation and Elaboration article discusses each checklist item and gives methodological background and published examples of transparent reporting. The STROBE checklist is best used in conjunction with this article (freely available on the Web sites of PLoS Medicine at <http://www.plosmedicine.org/>, Annals of Internal Medicine at <http://www.annals.org/>, and Epidemiology at <http://www.epidem.com/>). Information on the STROBE Initiative is available at [www.strobe-statement.org](http://www.strobe-statement.org).

# BMJ Open

## Retrospective Review of Tertiary and Neurosyphilis Cases in Alberta, 1973 to 2017

|                                 |                                                                                                                                                                                                                                                                                                                                                                                 |
|---------------------------------|---------------------------------------------------------------------------------------------------------------------------------------------------------------------------------------------------------------------------------------------------------------------------------------------------------------------------------------------------------------------------------|
| Journal:                        | <i>BMJ Open</i>                                                                                                                                                                                                                                                                                                                                                                 |
| Manuscript ID                   | bmjopen-2018-025995.R2                                                                                                                                                                                                                                                                                                                                                          |
| Article Type:                   | Research                                                                                                                                                                                                                                                                                                                                                                        |
| Date Submitted by the Author:   | 22-Apr-2019                                                                                                                                                                                                                                                                                                                                                                     |
| Complete List of Authors:       | Landry, Takaaki; University of Alberta<br>Smyczek, Petra; University of Alberta, Medicine/Infectious Diseases; Alberta Health Services<br>Cooper, Ryan; University of Alberta<br>Gratrix, Jennifer<br>Bertholet, Lindsay; Alberta Health Services<br>Read, Ron<br>Romanowski, Barbara; University of Alberta<br>Singh , AE; University of Alberta, Medicine/Infectious Diseases |
| <b>Primary Subject Heading</b>: | Infectious diseases                                                                                                                                                                                                                                                                                                                                                             |
| Secondary Subject Heading:      | Epidemiology                                                                                                                                                                                                                                                                                                                                                                    |
| Keywords:                       | Neurology < INTERNAL MEDICINE, SEXUAL MEDICINE, GENITOURINARY MEDICINE                                                                                                                                                                                                                                                                                                          |
|                                 |                                                                                                                                                                                                                                                                                                                                                                                 |

SCHOLARONE™  
Manuscripts



## Retrospective Review of Tertiary and Neurosyphilis Cases in Alberta, 1973 to 2017

### Authors and Affiliations:

Takaaki Landry BSc<sup>1</sup>; Petra Smyczek MD<sup>1,2,3</sup>; Ryan Cooper MD<sup>1</sup>; Jennifer Gratrix MSc<sup>2</sup>; Lindsay Bertholet MN<sup>2</sup>; Ron Read MD PhD<sup>4</sup>; Barbara Romanowski MD<sup>1,3</sup>; Ameeta E. Singh BMBS MSc<sup>1,3</sup>

<sup>1</sup>University of Alberta, Edmonton, Canada; <sup>2</sup>Provincial STI Services, Alberta Health Services, Edmonton, Canada; <sup>3</sup>Edmonton STI Clinic, Alberta Health Services, Edmonton, Canada;

<sup>4</sup>University of Calgary, Calgary, Alberta, Canada

**Key Words:** Syphilis, neurosyphilis, epidemiology, tertiary syphilis

**Funding Statement:** TL received funding as a post secondary summer student from Alberta Health Services.

**Competing Interests:** The authors declare no competing interests.

**Data Sharing Statement:** No additional data available

1  
2  
3 **Corresponding Author:**  
4

5 Dr. Ameeta Singh, BMBS (UK), MSc, FRCPC  
6

7  
8 Alberta Health Services – Edmonton STI Clinic  
9

10  
11 3B20-11111 Jasper Ave  
12

13  
14 Edmonton, AB. T5K0L4  
15

16  
17 Email : ameeta@ualberta.ca  
18

19  
20 Phone : 780 342 2300 Fax : 780 425 2194  
21  
22  
23  
24  
25

26 **Word Count:** Abstract:280; Manuscript:3207; Tables: 3; Figures: 3; References: 32  
27  
28  
29  
30  
31  
32  
33  
34  
35  
36  
37  
38  
39  
40  
41  
42  
43  
44  
45  
46  
47  
48  
49  
50  
51  
52  
53  
54  
55  
56  
57  
58  
59  
60

## 1 **Abstract**

2 **Objectives:** To review the notification rate and characteristics of tertiary and neurosyphilis  
3 cases in Alberta, Canada in the post-antibiotic era.

4 **Methods:** A retrospective review of all neurosyphilis and tertiary syphilis cases reported in  
5 Alberta from 1973 to March 2017 was undertaken and cases classified into early neurosyphilis,  
6 late neurosyphilis and cardiovascular syphilis. Variables collected included demographics,  
7 sexual partners, HIV status, clinical parameters, symptoms and treatment and distributions  
8 were compared between early versus late neurosyphilis and asymptomatic versus symptomatic  
9 cases (stratified by early versus late stage). Data was analyzed using IBM SPSS Statistics Version  
10 19.0.

11 **Results:** 254 cases were identified; 251 were neurosyphilis and 3 were cardiovascular. No cases  
12 of gummatous syphilis were reported. Early neurosyphilis accounted for 52.4% (n=133) and  
13 46.1% (n=117) were late neurosyphilis cases; one (0.4%) case with unknown duration. Three  
14 outbreaks of infectious syphilis were identified during the study period and a concurrent rise in  
15 both early and late neurosyphilis was observed during the outbreak periods. The most  
16 common manifestation of symptomatic neurosyphilis was ocular involvement which was more  
17 likely in early neurosyphilis. Relative to late neurosyphilis cases, early neurosyphilis cases were  
18 more likely to be younger, Caucasian, born in Canada, HIV positive and reporting same sex  
19 partners..

20 **Conclusions:** Our review of tertiary and neurosyphilis cases found that early and late  
21 neurosyphilis cases continue to occur in the context of cycling syphilis outbreaks.  
22 Cardiovascular syphilis cases were extremely rare. Ongoing identification of new cases of

1  
2  
3 23 syphilis and clinical evaluation of cases for complications continues to be important in the  
4  
5  
6 24 context of global resurgence of syphilis.  
7  
8  
9  
10  
11 26

12  
13 27 **Keywords:** tertiary syphilis, neurosyphilis, Canada  
14  
15  
16 28

17  
18 29 **Strengths and Limitations of this study:**  
19

- 20 30
- 21 • An important strength of our study was the consistent reporting of all cases with positive  
22 31 syphilis serology over the 44 year period by laboratories as well as active follow up of all cases  
23  
24 32 by the provincial STI program.  
25  
26  
27 33 • Another strength of our study is the retrospective application of current case definitions to all  
28  
29 34 cases by 2 experienced STI clinicians.  
30  
31 35 • One of the limitations to the retrospective review of data is the possibility of inaccurate  
32  
33 36 classification of cases due to insufficient available information.  
34  
35  
36 37 • Additional study limitations include changes in testing policies and practices, as well as changes  
37  
38 38 in social norms over time.  
39  
40 39 • Routine testing for HIV in cases of syphilis was also not conducted in earlier years and as such  
41  
42 40 the number of concurrent HIV infections may have been underestimated.  
43  
44  
45

46 41

47  
48 42

49  
50 43

51  
52 44

53  
54 45  
55  
56  
57  
58  
59  
60

1  
2  
3 46 **Manuscript**

4  
5  
6 47 **Background**

7  
8 48 Syphilis, caused by *Treponema pallidum* subspecies *pallidum*, passes through a series of stages,  
9  
10 49 including primary, secondary, latent, and tertiary syphilis if left untreated.<sup>1</sup> Based on data from  
11  
12  
13 50 the pre-antibiotic era, about a third of persons with untreated latent syphilis will develop late  
14  
15 51 neurosyphilis, cardiovascular syphilis or gummatous syphilis.<sup>2</sup> Gummatous syphilis is  
16  
17  
18 52 characterized by the development of indolent granulomatous lesions<sup>3</sup> which typically affect the  
19  
20 53 skin, liver, and bone but can also involve other parts of the body.<sup>4</sup> Syphilitic aortitis is the most  
21  
22  
23 54 common manifestation of cardiovascular syphilis and typically involves the ascending aorta.<sup>4-6</sup>  
24

25 55  
26  
27 56 Neurosyphilis can occur at any stage of syphilis.<sup>1,7</sup> It is classified into early and late forms.<sup>1</sup> Early  
28  
29  
30 57 neurosyphilis affects the cerebrospinal fluid (CSF), cerebral blood vessels, and meninges more  
31  
32  
33 58 often than the brain or spinal cord parenchyma. Typically, manifestations occur within weeks to  
34  
35 59 a few years after primary infection and may occur at the same time as primary or secondary  
36  
37  
38 60 syphilis, or may be asymptomatic. Manifestations may include meningitis with or without  
39  
40  
41 61 cranial nerve involvement, meningovascular disease or stroke. Late neurosyphilis can remain  
42  
43  
44 62 asymptomatic or progress to meningovascular syphilis, tabes dorsalis, or general paresis. Late  
45  
46  
47 63 neurosyphilis is extremely rare in the antibiotic era and usually occurs years to decades after  
48  
49  
50 64 primary infection.<sup>1,8</sup> HIV infection may affect the natural course of disease as atypical  
51  
52  
53 65 presentations and rapid progression of syphilis in HIV positive individuals has been reported.<sup>9-13</sup>  
54  
55  
56  
57  
58  
59  
60 66

1  
2  
3 67 In the pre-antibiotic era, an estimated one third of untreated persons developed tertiary  
4  
5 68 syphilis with about 15% progressing to gummatous disease (1-46 years post-infection), 10% to  
6  
7  
8 69 cardiovascular syphilis (20-30 years after infection), and 4-14% to late neurosyphilis (2-50 years  
9  
10 70 after infection).<sup>1</sup> After the introduction of penicillin in the 1940s, the number of cases of syphilis  
11  
12 71 plummeted in the United States, reaching a nadir in 2000.<sup>1</sup> Nowadays, tertiary syphilis is a rare  
13  
14 72 disease due to easy and effective treatment of infectious and latent syphilis. Antibiotic use for  
15  
16 73 other infections is also likely a factor.  
17  
18  
19  
20 74

21  
22 75 In Canada, syphilis (all stages) has been nationally notifiable since 1924. However national  
23  
24 76 reports only include data on infectious syphilis, since only these cases are of major public health  
25  
26 77 significance.<sup>14</sup> In Alberta, all cases of syphilis, including tertiary and neuro-syphilis have been  
27  
28 78 notifiable to a centralized program under the Public Health Act since 1921. Syphilis notification  
29  
30 79 rates have fluctuated over the last fifty years with a rise in notification rates during outbreak  
31  
32 80 periods. Since 2000, notification rates of infectious syphilis have increased dramatically in  
33  
34 81 Alberta (0.6/100,000 population in 2000 to 12.5/100,000 population in 2017), with the most  
35  
36 82 recent resurgence among men who have sex with men (MSM) and up to 30% of patients co-  
37  
38 83 infected with HIV (personal communication Jennifer Gratrix, Provincial STI Services, Alberta  
39  
40 84 Health Services).<sup>15</sup>  
41  
42  
43  
44  
45  
46  
47  
48  
49

50 86 There are few data on the prevalence and characteristics of tertiary and neuro-syphilis cases in  
51  
52 87 the post antibiotic era. We are aware of only one study from the Netherlands which estimated  
53  
54 88 that 10-13% of all syphilis cases from 1999-2010 had neurosyphilis; these data were limited by  
55  
56  
57  
58  
59  
60

89 the fact that the diagnostic criteria used for neurosyphilis was based on hospital discharge  
 90 diagnosis rather than clinical examination or laboratory criteria.<sup>16</sup> We sought to determine the  
 91 notification rate and characteristics of reported cases of tertiary and neurosyphilis in Alberta  
 92 from 1973 onwards.

## 94 **Methods**

95 A retrospective review was conducted of all tertiary and neurosyphilis cases in Alberta (current  
 96 population 4.3 million) from 1973 (when syphilis data was first available by staging) to March  
 97 2017 (most recent cases staged at time of data collection). All cases of syphilis are reportable by  
 98 laboratories and clinicians to Provincial STI Services under the Alberta Public Health Act. A  
 99 paper chart was created for each syphilis case containing laboratory results, medical  
 100 correspondence, syphilis-relevant history, clinical findings, and staging. Cases diagnosed since  
 101 2000 were also entered into a provincial surveillance database. Cases were classified as defined  
 102 in Table 1.<sup>17</sup>

104 Table 1: Case Definitions Used for Diagnosis of Neurosyphilis and Tertiary Syphilis (Adapted  
 105 from<sup>17</sup>:

| Syphilis stage    | Definition                                                                                                                                                                                                                                                     |
|-------------------|----------------------------------------------------------------------------------------------------------------------------------------------------------------------------------------------------------------------------------------------------------------|
| Tertiary syphilis | Reactive treponemal serology together with characteristic late abnormalities of the cardiovascular system, bone, skin or other structures, in the absence of other known causes of these abnormalities and no clinical or laboratory evidence of neurosyphilis |

|                                                                                               |                                                                                                                                                                                                                                                                                                                                                                                                                                  |
|-----------------------------------------------------------------------------------------------|----------------------------------------------------------------------------------------------------------------------------------------------------------------------------------------------------------------------------------------------------------------------------------------------------------------------------------------------------------------------------------------------------------------------------------|
| <p>Early Neurosyphilis<br/>(<br/>&lt; 1 year after<br/>infection)<br/><i>Asymptomatic</i></p> | <p>Laboratory confirmation of primary, second or early latent syphilis and</p> <ul style="list-style-type: none"> <li>i) reactive CSF-VDRL in non-bloody CSF</li> </ul> <p>AND/OR</p> <ul style="list-style-type: none"> <li>ii) elevated CSF leukocytes (&gt;5/micro) and/or elevated CSF protein (&gt;45 mg/dL) in the absence of other known causes</li> </ul> <p>AND</p> <p>NO signs or symptoms of neurosyphilis</p>        |
| <p>Early Neurosyphilis<br/>(<br/>&lt; 1 year after<br/>infection)<br/><i>Symptomatic</i></p>  | <p>Laboratory confirmation of primary, second or early latent syphilis and</p> <ul style="list-style-type: none"> <li>i) reactive CSF-VDRL in non-bloody CSF</li> </ul> <p>AND/OR</p> <ul style="list-style-type: none"> <li>ii) elevated CSF leukocytes (&gt;5/micro) and/or elevated CSF protein (&gt;45 mg/dL) in the absence of other known causes</li> </ul> <p>AND</p> <p>clinical signs or symptoms of neurosyphilis*</p> |
| <p>Late neurosyphilis<br/>(<br/>&gt;1 year after<br/>infection)<br/><i>Asymptomatic</i></p>   | <p>Reactive treponemal serology (not staged as primary, secondary or early latent syphilis) and</p> <ul style="list-style-type: none"> <li>i) reactive CSF-VDRL in non-bloody CSF</li> </ul> <p>AND/OR</p> <ul style="list-style-type: none"> <li>ii) elevated CSF leukocytes (&gt;5/micro) and/or elevated CSF protein (&gt;45 mg/dL) in the absence of other known causes</li> </ul>                                           |



|                                                                          |                                                                                                                                                                                                                                                                                                                                               |
|--------------------------------------------------------------------------|-----------------------------------------------------------------------------------------------------------------------------------------------------------------------------------------------------------------------------------------------------------------------------------------------------------------------------------------------|
|                                                                          | AND<br><br>NO clinical signs or symptoms of neurosyphilis                                                                                                                                                                                                                                                                                     |
| Late neurosyphilis<br>(>1 year after<br>infection)<br><i>Symptomatic</i> | Reactive treponemal serology (not staged as primary, secondary or early latent syphilis) and<br><br>iii) reactive CSF-VDRL in non-bloody CSF<br><br>AND/OR<br><br>iv) elevated CSF leukocytes (>5/micro) and/or elevated CSF protein (>45 mg/dL) in the absence of other known causes<br><br>AND clinical signs or symptoms of neurosyphilis* |

106

107 \*if ocular or otic signs or symptoms present with a normal CSF examination, patient was  
108 classified as symptomatic neurosyphilis (early or late)

109

110 Serological testing for syphilis changed during the study period, with reverse sequence syphilis  
111 screening (RSSS) using an enzyme immunoassay being introduced in September 2007; prior to  
112 this a quantitative Rapid Plasma Reagin (RPR) was used. Since the criteria for classifying  
113 neurosyphilis evolved over time, all neurosyphilis cases during the study period were reviewed  
114 by two STI physicians and classified into early asymptomatic, early symptomatic, late  
115 asymptomatic, late symptomatic neurosyphilis cases; disagreement between the classifications  
116 of cases was resolved by consensus between the two physicians (PS and AES).

1  
2  
3 117  
4  
5  
6 118 Reported notification rates of other stages of syphilis prior to 2000 were obtained from  
7  
8 119 historical surveillance reports from Alberta STI Services beginning in 1975. Population  
9  
10 120 denominators were obtained through government population estimates.<sup>18</sup> An outbreak was  
11  
12  
13 121 defined as an increase in infectious syphilis cases of two standard deviations above the baseline  
14  
15 122 (previous 5 year quarterly average) for the given time period.  
16  
17

18 123  
19  
20 124 Variables collected for analysis included demographics, sexual partners, HIV status (testing  
21  
22 125 available since 1985<sup>19</sup> and recommended for all syphilis cases once serology available),  
23  
24  
25 126 diagnosis date, clinical parameters, symptoms, and treatment. Variables for cases diagnosed  
26  
27 127 prior to 2004 were captured through chart review, while variables for cases diagnosed after  
28  
29  
30 128 2004 were extracted from the provincial STI surveillance system. Client reported symptoms  
31  
32 129 were broken into five categories (not mutually exclusive) based on system involvement: ocular  
33  
34  
35 130 (e.g. uveitis, retinal, vision loss), auditory (e.g. hearing loss, tinnitus), ataxia, cognitive  
36  
37 131 impairment (e.g. dementia, psychosis), and other (aphasia, stroke, reduced level of  
38  
39  
40 132 consciousness, headache, and unspecified neurological symptoms).  
41

42 133  
43  
44  
45 134 Treatment data was divided into 3 mutually exclusive categories based on the following  
46  
47 135 minimum treatments: 1) penicillin G 3-4 million units IV q 4 h (18-24 million units/day) for 10 -  
48  
49  
50 136 14 days, 2) ceftriaxone 2 g IV/IM daily x 10-14 days, 3) Other, which included drugs like  
51  
52 137 chloramphenicol, doxycycline, tetracycline, benzathine penicillin G- long acting, reduced doses  
53  
54  
55 138 of penicillin G or ceftriaxone.  
56  
57

1  
2  
3 139  
4  
5  
6 140 Analysis was stratified by stage of syphilis to compare early and late neurosyphilis by the  
7  
8 141 previously listed variables using Chi-square or Fisher's exact for categorical variables and Mann-  
9  
10 142 Whitney tests for continuous variables. Missing data was categorized as unknown and included  
11  
12  
13 143 in the analysis. As well, each syphilis stage was stratified by asymptomatic and symptomatic for  
14  
15 144 comparison. The significance was set at a two-sided  $p$ -value of  $<0.05$ . A sensitivity analysis to  
16  
17 145 verify univariate findings by cases diagnosed pre- and post-2000 was considered; however,  
18  
19  
20 146 small cell sizes precluded the inclusion of early neurosyphilis and changes to syphilis screening  
21  
22  
23 147 in 2007 increasing the diagnosis of late latent syphilis cases were already known. Data was  
24  
25 148 analyzed using IBM SPSS Statistics version 19.0 (IBM, Armonk, NY, USA). This study was  
26  
27  
28 149 approved by the University of Alberta Health Research Ethics Board (Approval Number:  
29  
30 150 Pro00075972).

31  
32  
33 151

### 34 35 152 ***Patient and Public Involvement***

36  
37 153 Patients were not involved in the design of this research study.  
38  
39

40 154

### 41 42 155 **Results**

43  
44  
45 156 A total of 254 cases were identified during the study period, of which 251 were neurosyphilis  
46  
47 157 and 3 were cardiovascular (CV) cases; one case of CV syphilis was reported in each of the  
48  
49  
50 158 following years: 1976, 1979, and 1984. No cases of gummatous syphilis were reported during  
51  
52 159 this time period. The neurosyphilis cases were evenly divided as early (52.4%;  $n=133$ ) and late  
53  
54 160 (46.1%;  $n=117$ ), with one additional case of unknown duration. Three individuals were

1  
2  
3 161 diagnosed with two distinct episodes of neurosyphilis over the course of the reporting period.  
4

5 162 All three of these individuals were men who reported same sex partners, all six episodes were  
6

7 163 diagnosed between 2005 and 2014, and all categorized as early neurosyphilis. Two of these  
8

9 164 men were co-infected with HIV.  
10  
11  
12

13 165

14  
15 166 Between 1975 and 2016, 8,874 total cases of syphilis were reported in Alberta. Of these, 4,513  
16

17 167 (51%) were infectious (i.e. staged as primary, secondary, early latent) and 4,361 (49%) were  
18

19 168 classified as non-infectious (i.e. late latent, tertiary). Over the time period, three outbreaks of  
20

21 169 infectious syphilis were identified (Figure 1). The first outbreak occurred between 1981 and  
22

23 170 1987, the second outbreak commenced in 2000 and declined in 2011, and a third outbreak  
24

25 171 began in 2015 and continues. Of the infectious syphilis cases, 2.8% (n=128) were staged as early  
26

27 172 neurosyphilis. When plotting the notification rate of early neurosyphilis cases, increases in the  
28

29 173 rate were found at corresponding times to infectious syphilis outbreaks #2 and #3 (Figure 2). Of  
30

31 174 the noninfectious syphilis cases staged during this time, 2.6% (115/4316) were staged with late  
32

33 175 neurosyphilis. Similarly, for late neurosyphilis, peaks in notification rates were found shortly  
34

35 176 after outbreak #1 and outbreak #2 (Figure 2).  
36  
37

38 177 Early neurosyphilis cases were significantly younger, more likely to be Caucasian, born in  
39

40 178 Canada, diagnosed in recent decades (2010's), reported same sex partners, and HIV positive as  
41

42 179 compared to late neurosyphilis cases (Table 2).  
43  
44

45 180 Table 2: Characteristics of Early and Late Neurosyphilis (Alberta, 1973 to March 2017; n=250)  
46  
47

|  | Early Neurosyphilis | Late Neurosyphilis | Compar |
|--|---------------------|--------------------|--------|
|  |                     |                    |        |

|                  | Asymptomatic<br>(n=28) | Symptomatic<br>(n=105) | Total<br>(n=133) | p-Value | Asymptomatic<br>(n=47) | Symptomatic<br>(n=70) | Total<br>(n=117) | p-Value | Comparison of<br>Early<br>and<br>Late p-<br>Value |
|------------------|------------------------|------------------------|------------------|---------|------------------------|-----------------------|------------------|---------|---------------------------------------------------|
| Median Age (IQR) | 40 (32-46)             | 47 (39-55)             | 44 (36-54)       | 0.02    | 45 (32-65)             | 64 (53-75)            | 58 (45-70)       | <0.001  | <0.001                                            |
| <b>Gender</b>    |                        |                        |                  |         |                        |                       |                  |         |                                                   |
| Female           | 8 (28.6)               | 12 (11.4)              | 20 (15.0)        | 0.02    | 6 (12.8)               | 15 (21.4)             | 21 (17.9)        | 0.23    | 0.54                                              |
| Male             | 20 (71.4)              | 93 (88.6)              | 113 (85.0)       |         | 41 (87.2)              | 55 (78.6)             | 96 (82.1)        |         |                                                   |
| <b>Ethnicity</b> |                        |                        |                  |         |                        |                       |                  |         |                                                   |
| Indigenous       | 6 (21.4)               | 6 (5.7)                | 12 (9.0)         | 0.001   | 6 (12.8)               | 3 (4.3)               | 9 (7.7)          | 0.44    | <0.001                                            |

|                     |           |              |              |      |           |              |              |      |      |
|---------------------|-----------|--------------|--------------|------|-----------|--------------|--------------|------|------|
| Caucasia<br>n       | 10 (35.7) | 78<br>(74.3) | 88<br>(66.2) |      | 14 (29.8) | 23<br>(32.9) | 37<br>(31.6) |      |      |
| Other               | 3 (10.7)  | 4 (3.8)      | 7<br>(5.3)   |      | 16 (34.0) | 27<br>(38.6) | 43<br>(36.8) |      |      |
| Unknown<br>n        | 9 (32.1)  | 17<br>(16.2) | 26<br>(19.5) |      | 11 (23.4) | 17<br>(24.3) | 28<br>(23.9) |      |      |
| <b>Municipality</b> |           |              |              |      |           |              |              |      |      |
| Calgary             | 9 (32.1)  | 32<br>(30.5) | 41<br>(30.8) | 0.62 | 10 (21.3) | 22<br>(31.4) | 32<br>(27.4) | 0.46 | 0.59 |
| Edmonton            | 15 (53.6) | 48<br>(45.7) | 63<br>(47.4) |      | 28 (59.6) | 35<br>(50.0) | 63<br>(53.8) |      |      |
| Other               | 4 (14.3)  | 25<br>(23.8) | 29<br>(21.8) |      | 9 (19.1)  | 13<br>(18.6) | 22<br>(18.8) |      |      |

|                            |           |              |              |      |           |              |              |      |        |
|----------------------------|-----------|--------------|--------------|------|-----------|--------------|--------------|------|--------|
| <b>Country of Birth</b>    |           |              |              |      |           |              |              |      |        |
| Canada                     | 16 (57.1) | 56<br>(53.3) | 72<br>(54.1) | 0.23 | 23 (48.9) | 16<br>(22.9) | 39<br>(33.3) | 0.01 | <0.001 |
| Outside of Canada          | 5 (17.9)  | 9 (8.6)      | 14<br>(10.5) |      | 17 (36.2) | 36<br>(51.4) | 53<br>(45.3) |      |        |
| Unknown                    | 7 (25.0)  | 40<br>(38.1) | 47<br>(35.3) |      | 7 (14.9)  | 18<br>(25.7) | 25<br>(21.4) |      |        |
| <b>Decade of Diagnosis</b> |           |              |              |      |           |              |              |      |        |
| 1970's                     | 1 (3.6)   | 1 (1.0)      | 2<br>(1.5)   | 0.00 | 4 (8.5)   | 1 (1.4)      | 5<br>(4.3)   | 0.29 | <0.001 |
| 1980's                     | 6 (21.4)  | 3 (2.9)      | 9<br>(6.8)   |      | 13 (27.7) | 15<br>(21.4) | 28<br>(23.9) |      |        |

|                            |           |              |              |      |           |              |              |           |        |
|----------------------------|-----------|--------------|--------------|------|-----------|--------------|--------------|-----------|--------|
| 1990's                     | 3 (10.7)  | 5 (4.8)      | 8<br>(6.0)   |      | 6 (12.8)  | 9 (12.7)     | 15<br>(12.8) |           |        |
| 2000's                     | 8 (28.6)  | 28<br>(26.7) | 36<br>(27.1) |      | 4 (8.5)   | 20<br>(28.6) | 24<br>(20.5) |           |        |
| 2010's                     | 10 (35.7) | 68<br>(64.8) | 78<br>(58.6) |      | 20 (42.6) | 25<br>(35.7) | 45<br>(38.5) |           |        |
| <b>Sexual<br/>Partners</b> |           |              |              |      |           |              |              |           |        |
| Heteros<br>exual           | 12 (42.9) | 46<br>(43.8) | 58<br>(43.6) | 1.00 | 30 (63.8) | 38<br>(54.3) | 68<br>(58.1) | 0.00<br>2 | <0.001 |
| Same<br>Sex                | 14 (50.0) | 52<br>(49.5) | 66<br>(49.6) |      | 11 (23.4) | 5 (7.1)      | 16<br>(13.7) |           |        |
| Unknow<br>n                | 2 (7.1)   | 7 (6.7)      | 9<br>(6.8)   |      | 6 (12.8)  | 27<br>(38.6) | 33<br>(28.2) |           |        |



|                   |           |              |               |            |           |              |              |            |        |
|-------------------|-----------|--------------|---------------|------------|-----------|--------------|--------------|------------|--------|
| <b>HIV Status</b> |           |              |               |            |           |              |              |            |        |
| Negative          | 5 (17.9)  | 68<br>(64.8) | 73<br>(54.9)  | <0.0<br>01 | 19 (40.4) | 27<br>(38.6) | 46<br>(39.3) | 0.31       | <0.001 |
| Positive          | 17 (60.7) | 30<br>(28.6) | 47<br>(35.3)  |            | 8 (17.0)  | 6 (8.6)      | 14<br>(12.0) |            |        |
| Unknown           | 6 (21.4)  | 7 (6.7)      | 13<br>(9.8)   |            | 20 (42.6) | 37<br>(52.9) | 57<br>(48.7) |            |        |
| <b>Treatment</b>  |           |              |               |            |           |              |              |            |        |
| Penicillin G      | 22 (78.6) | 82<br>(78.1) | 104<br>(78.2) | 0.87       | 21 (44.7) | 63<br>(90.0) | 84<br>(71.8) | <0.0<br>01 | 0.43   |
| Ceftriaxone       | 3 (10.7)  | 14<br>(13.3) | 17<br>(12.8)  |            | 12 (25.5) | 5 (7.1)      | 17<br>(14.5) |            |        |

|       |          |         |             |  |           |         |                  |  |  |
|-------|----------|---------|-------------|--|-----------|---------|------------------|--|--|
| Other | 3 (10.7) | 9 (8.6) | 12<br>(9.0) |  | 14 (29.8) | 2 (2.9) | 16<br>(13.7<br>) |  |  |
|-------|----------|---------|-------------|--|-----------|---------|------------------|--|--|

181

182 Among early neurosyphilis cases, 79.0% (n=105) were symptomatic; symptomatic cases were  
 183 more likely to be older, male, Caucasian, recently diagnosed (2010's), and HIV negative  
 184 compared to asymptomatic cases. Among late neurosyphilis cases, 59.8% (n=70) were  
 185 symptomatic; symptomatic cases were more likely to be older, born outside of Canada, and  
 186 treated with intravenous penicillin G, and less likely to have a same sex partner as compared to  
 187 asymptomatic cases.

188

189 The majority (79.9%; n=139) of symptomatic cases reported a single manifestation. The most  
 190 common clinical manifestation of the symptomatic cases (41.1%; n=72) was ocular  
 191 involvement; early neurosyphilis cases were more likely to have ocular involvement than late  
 192 neurosyphilis cases (Table 3). The first case of ocular syphilis was reported in 1990 with the  
 193 majority (68.1%; n=49) of cases being diagnosed between 2010 and 2017. The second most  
 194 common (33.7%; n=59) manifestation of symptomatic neurosyphilis was cognitive impairment  
 195 with significantly more late neurosyphilis cases reporting these symptoms than early cases.  
 196 Twelve (6.9 %) cases reported auditory symptoms and 10.9% (n=19) reported ataxia. Nearly  
 197 one-third (29.7%; n=52) of cases reported other symptoms including aphasia, stroke, reduced  
 198 level of consciousness, headache, and unspecified neurological symptoms.

199 Table 3: Manifestations of Early and Late Symptomatic Neurosyphilis (Alberta, 1973 to March  
 200 2017; n=175)

| Manifestation        | Early Neurosyphilis<br>(n=105) | Late Neurosyphilis<br>(n=70) | P-Value |
|----------------------|--------------------------------|------------------------------|---------|
| Ocular               | 59 (56.2)                      | 13 (18.6)                    | <0.001  |
| Cognitive Impairment | 20 (19.0)                      | 39 (55.7)                    | <0.001  |
| Ataxia               | 9 (8.6)                        | 10 (14.3)                    | 0.23    |
| Auditory             | 10 (9.5)                       | 2 (2.9)                      | 0.13    |
| Other*               | 30 (28.6)                      | 22 (31.4)                    | 0.69    |

- \*Aphasia, reduced level of consciousness, headache, unspecified neurological symptoms

202 Although the first HIV co-infected case was reported in 1986, over one-half (57.4%; n=35) of  
 203 HIV co-infected cases were reported between 2010 and 2017. The majority (62.2%; n= 46) of  
 204 cases with an unknown HIV status occurred between the 1970's and 1980's, prior to the clinical  
 205 availability of diagnostic serology. Cases that had HIV test results were significantly younger (47  
 206 years; IQR: 37-55) than cases without HIV test results (64 years; IQR: 44-70; p<0.001).

207  
 208 Thirty-six (14.2%) of all the cases were diagnosed without a lumbar puncture result. Nearly all  
 209 of these clinical cases (97.2%; n=35) were symptomatic. The remaining asymptomatic case was  
 210 diagnosed based on an inadequate fall in RPR titres over time. There was no significant  
 211 difference by HIV status for those who had and did not have a lumbar puncture (p=0.62).

212 Clinical parameters by HIV status are outlined in Figure 3. Of the 2 HIV-positive and 6 HIV-  
 213 negative cases with negative clinical parameters, all were symptomatic cases.

1  
2  
3 214  
4  
5  
6 215 The majority (74.4%; n=189) of all cases were treated with intravenous penicillin G.  
7  
8 216 Asymptomatic late neurosyphilis cases were less likely to be treated with penicillin G (44.7%;  
9  
10 217 n=21) as compared to symptomatic late neurosyphilis (90.0%; n=63; p<0.001). There was a rise  
11  
12 218 in the use of ceftriaxone in late neurosyphilis treatment from no use in the 1970's to 1990's, to  
13  
14 219 12.5% (n=3) in 2000's and 31.1% (n=14) in the 2010's. Other drug combinations for  
15  
16 220 neurosyphilis was highest in the 1970's (85.7%; n=6) and dropped to a low of 4.3% (n=1) in the  
17  
18 221 1990's.  
19  
20  
21  
22  
23  
24

## 25 223 **Discussion**

26  
27 224 A review of the trends in reported cases of infectious syphilis from 1975 to March, 2017 in  
28  
29 225 Alberta shows a cycling in the number of cases over time. During this time period, the first  
30  
31 226 major outbreak of infectious syphilis occurred between 1981 and 1987, with the majority of  
32  
33 227 cases between 1983 and 1985.<sup>20</sup> A quiescent period of approximately two decades followed  
34  
35 228 with a resurgence in infectious cases in 2000 followed by a decline in 2011 and then another  
36  
37 229 rise in 2015. These observations are consistent with a study of long term trends in reported  
38  
39 230 primary and secondary syphilis cases in the United States which showed recurrent peaks and  
40  
41 231 troughs in approximately 10-year cycles.<sup>21</sup> This pattern of periodic resurgence of syphilis has  
42  
43 232 variously been attributed to either failure to sustain control efforts, changing risk behaviours  
44  
45 233 (such as crack cocaine use), and waxing and waning partial host immunity to infection at the  
46  
47 234 population level.<sup>22,23</sup> Interestingly, our province observed a 20-year gap between the outbreak  
48  
49  
50  
51  
52  
53  
54 235 in the mid 1980s and the mid 2000s. The reasons for this prolonged gap are unclear but are  
55  
56  
57  
58  
59  
60

1  
2  
3 236 likely multi-factorial including a well-established and sustained prevention and control program  
4  
5  
6 237 for STIs in the province, emergence of HIV and the mass education that occurred during this  
7  
8 238 time period. This theory is supported by declining notification rates of gonorrhoea and chlamydia  
9  
10 239 until 1998 and then subsequent rises to current rates.<sup>24</sup> Our observed rising notification rates of  
11  
12 240 infectious syphilis since the mid-2000s are consistent with many jurisdictions across Canada and  
13  
14  
15 241 the United States.<sup>14,25</sup> The rise in late latent syphilis in 2007 has been attributed to the  
16  
17 242 introduction of RSSS.<sup>26</sup>  
18  
19  
20 243  
21  
22  
23 244 Some studies have reported a rise in cases of neurosyphilis related to outbreaks of infectious  
24  
25 245 syphilis. One possible explanation for this is that the overall rise in notification rates of  
26  
27 246 infectious syphilis could potentially increase the pool of persons progressing to neurosyphilis  
28  
29  
30 247 and tertiary syphilis. For example, a study conducted in British Columbia, one of Alberta's  
31  
32 248 neighboring provinces, reported that in the context of rising rates of infectious syphilis, the  
33  
34 249 neurosyphilis rate was 0.03 per 100,000 in 1992 and increased 27-fold to 0.8 per 100,000 in  
35  
36  
37 250 2012.<sup>27</sup> Investigators from Guangdong province in China similarly reported an incidence rate  
38  
39 251 increase in neurosyphilis cases from 0.21 cases per 100,000 persons in 2009 to 0.31 cases per  
40  
41  
42 252 100,000 persons in 2014 and in tertiary cases from 0.28 cases per 100,000 persons in 2009 to  
43  
44 253 0.36 cases per 100,000 persons in 2014.<sup>28</sup> Neither of these studies, however, distinguished  
45  
46  
47 254 between early and late neurosyphilis cases. In our review, we observed a significant rise in early  
48  
49 255 neurosyphilis during the outbreak periods and a significant decline after the outbreak periods,  
50  
51  
52 256 e.g. only one case was observed in 2012 after the second outbreak. We had expected to see a  
53  
54 257 sustained increase in late neurosyphilis cases based on the hypothesis that the number of  
55  
56  
57  
58  
59  
60

1  
2  
3 258 untreated infected persons with syphilis would increase over time but there was no significant  
4  
5  
6 259 increase during the overall observation period. Interestingly, a rise in late neurosyphilis cases  
7  
8 260 was observed towards the end of the outbreak periods, perhaps due to heightened awareness  
9  
10  
11 261 and increased testing due to public health announcements during the outbreak periods and  
12  
13 262 also because late (tertiary) neurosyphilis can occur as soon as two years post-infection.<sup>1</sup>

14  
15 263 Although individuals diagnosed with late symptomatic neurosyphilis are not infectious and  
16  
17  
18 264 therefore not of concern from a public health perspective, these individuals would benefit from  
19  
20 265 screening and appropriate treatment for syphilis to prevent complications of tertiary syphilis.<sup>1</sup>

21  
22 266  
23  
24  
25 267 Early neurosyphilis cases were more likely to be younger, Caucasian, born in Canada, HIV  
26  
27  
28 268 positive and reporting same sex partners. These observations parallel the observed rise in  
29  
30 269 infectious syphilis during the third outbreak and may also be related to selection bias since  
31  
32 270 lumbar punctures were more likely to be performed in HIV positive persons in the early years,  
33  
34  
35 271 especially those with low CD<sub>4</sub> counts (<350) and/or RPR  $\geq$  1:32 dilutions as recommended in the  
36  
37 272 Canadian STI Guidelines.<sup>29</sup> In addition, most clinicians providing care to HIV positive individuals  
38  
39  
40 273 in Alberta would have offered regular syphilis screening in HIV positive individuals, as endorsed  
41  
42 274 for several years in the U.S. Department of Health and Human Services guidelines.<sup>30</sup>

43  
44 275  
45  
46  
47 276 The most common manifestation (40%) of symptomatic neurosyphilis was ocular involvement  
48  
49  
50 277 with cases of early neurosyphilis more likely than cases of late neurosyphilis to have ocular  
51  
52 278 involvement (54% vs 17%,  $p < 0.001$ ). Two-thirds of ocular cases were reported between 2010  
53  
54 279 and 2017, with 46.4% reported among MSM, similar to other studies.<sup>31</sup> Late neurosyphilis cases

1  
2  
3 280 were more likely to be older, born outside of Canada and less likely to report same sex  
4  
5  
6 281 partners, paralleling the demographics of late latent cases of syphilis in our province (data not  
7  
8 282 shown).

9  
10 283  
11  
12  
13 284 Our study identified very few (n=3) cardiovascular cases of tertiary syphilis with all cases  
14  
15 285 identified at the time of a diagnosis of aortic aneurysm. This likely represents an underestimate  
16  
17  
18 286 in the actual number of cases of CV syphilis as we suspect that most patients with aortic  
19  
20 287 aneurysm or initial cardiovascular involvement do not have syphilis testing performed. In  
21  
22  
23 288 Alberta, the provincial STI program facilitates the assessment of all late stage syphilis cases by a  
24  
25 289 physician who then conducts a neurological and cardiovascular examination. A chest  
26  
27  
28 290 radiograph, recommended in the past in some jurisdictions to look for linear calcification of the  
29  
30 291 ascending aorta, a radiological sign of syphilitic aortitis is not routinely done. Chest radiographs  
31  
32  
33 292 for the evaluation of CV syphilis in asymptomatic patients with LLS is of such low yield, that it is  
34  
35 293 not routinely recommended.<sup>32</sup> Neither clinical examination nor chest radiograph is likely to be  
36  
37  
38 294 sensitive enough to identify cases of CV syphilis and given the presumed rarity of this condition  
39  
40 295 and that the treatment is the same as for LLS, further evaluations (e.g. echocardiograms) are  
41  
42 296 not warranted.

43  
44  
45 297  
46  
47 298 No cases of gummatous syphilis were reported during our study period. Although syphilitic  
48  
49  
50 299 gummas were reported in up to 15% cases in the pre-antibiotic era, it is possible that the  
51  
52 300 widespread use of antibiotics for other conditions, which may indirectly treat or partially treat  
53  
54 301 syphilis, has affected the occurrence.

1  
2  
3 302  
4  
5  
6 303 One of the strengths of our study is that there was consistent reporting of all cases with  
7  
8 304 positive syphilis serology over time by laboratories and active follow up by the provincial STI  
9  
10 305 program with health care providers. We were able to apply current case definitions  
11  
12 306 retrospectively to all cases; however, one of the limitations to retrospective review of data is  
13  
14 307 the possibility of inaccurate classification of cases. Our review by two experienced medical  
15  
16 308 consultants resulted in only one case where insufficient information was available to classify  
17  
18 309 the case with reasonable accuracy. Additional study limitations include changes in and quality  
19  
20 310 of data collection practices over time, with improved data quality over time. The information  
21  
22 311 about gender of sex partners may have been inaccurate in earlier years due to stigma  
23  
24 312 associated with same sex partners. Routine testing for HIV in cases of syphilis was also not  
25  
26 313 conducted in earlier years and as such the number of concurrent HIV infections may be  
27  
28 314 underestimated.  
29  
30  
31  
32  
33  
34

35 315  
36  
37 316 In summary, our review of tertiary and neurosyphilis cases in Alberta over a 44-year period  
38  
39 317 found that early and late neurosyphilis cases continue to occur in the context of cycling of  
40  
41 318 infectious syphilis outbreaks. Ocular disease was the most common manifestation of  
42  
43 319 neurosyphilis in our study. On the other hand, cardiovascular syphilis was extremely rare and  
44  
45 320 no cases of gumma were identified. Ongoing identification of syphilis cases with prompt  
46  
47 321 treatment and follow up continues to be important in the context of resurgence of infectious  
48  
49 322 syphilis worldwide.  
50  
51  
52  
53

54 323  
55  
56  
57  
58  
59  
60



1  
2  
3 324 **Author contributions:** TL reviewed hard copy records of all cases and conducted data entry into  
4  
5  
6 325 an Excel file; PS and AS reviewed and re-classified all cases; JG conducted data analysis; JG and  
7  
8 326 AS drafted initial versions of the manuscript; TL, PS, RC, JG, LB, RR, BR and AES helped develop  
9  
10 327 the study design and reviewed drafts of the manuscript.  
11  
12

13 328

14  
15 329

16  
17 330

18  
19 331

20  
21 332

22  
23 333

24  
25 334

26  
27 335

28  
29 336

30  
31 337

32  
33 338

34  
35 339

36  
37 340

38  
39 341

40  
41 342

42  
43 343

44  
45 344

46  
47 345

48  
49

50  
51

52  
53

346 **References**

- 347 1. Golden MR, Marra CM, Holmes KK. Update on syphilis: resurgence of an old problem.  
348 *JAMA* 2003; 290: 1510-4.
- 349 2. Gjestland T. The Oslo study of untreated syphilis: An epidemiologic investigation of the  
350 natural course of syphilitic infection based on a restudy of the Boeck-Bruusgaard  
351 material. *J Chronic Dis* 1955; 2: 311-44.
- 352 3. Kent ME, Romanelli F. Examining syphilis: an update on epidemiology, clinical  
353 manifestations, and management. *Annals of Pharmacotherapy* 2008: 226-36.
- 354 4. Kampmeier RH. The late manifestations of syphilis: skeletal, visceral and cardiovascular.  
355 *Med Clin North Am* 1964; 48:667-697.
- 356 5. Cole HN. Cooperative clinical studies in the treatment of syphilis. The effect of specific  
357 therapy on the prophylaxis and progress of cardiovascular syphilis. *JAMA* 1937;  
358 108:1861-1866.
- 359 6. Howles JK. *Synopsis of clinical syphilis*. St. Louis, MO: Mosby Co, 1943.
- 360 7. Marra CM. Neurosyphilis. *Continuum (Minneap Minn)* 2015;21:1714-28.
- 361 8. Merritt HH. *Neurosyphilis*. New York, NY: Oxford University Press, 1946.
- 362 9. Berry CD. Neurologic relapse after benzathine penicillin therapy for secondary syphilis in  
363 a patient with HIV infection. *N Engl J Med* 1987;316:1587-15.
- 364 10. Johns DR. Alteration in the natural history of neurosyphilis by concurrent infection with  
365 the human immunodeficiency virus. *N Engl Med* 1987;316:1569-1572.
- 366 11. Rolfs RT. A randomized trial of enhanced therapy for early syphilis in patients with or  
367 without human immunodeficiency virus infection. *N Engl J Med* 1997;337:307-314.

- 1  
2  
3 368 12. Lukehart SA, Hook EW III, Baker-Zander SA, *et al.* Invasion of the central nervous system  
4  
5 369 by *Treponema pallidum*: implications for diagnosis and treatment. *Ann Intern Med* 1988;  
6  
7 370 109: 855–62.  
8  
9  
10 371 13. Musher DM. Effect of human immunodeficiency virus (HIV) infection on the course of  
11  
12 372 syphilis and on the response to treatment. *Ann Intern Med* 1990;113:872-881.  
13  
14 373 14. Public Health Agency of Canada. Report on Sexually Transmitted Infections in Canada:  
15  
16 374 2013-2014. [https://www.canada.ca/en/public-health/services/publications/diseases-](https://www.canada.ca/en/public-health/services/publications/diseases-conditions/report-sexually-transmitted-infections-canada-2013-14.html#a41)  
17  
18 375 [conditions/report-sexually-transmitted-infections-canada-2013-14.html#a41](https://www.canada.ca/en/public-health/services/publications/diseases-conditions/report-sexually-transmitted-infections-canada-2013-14.html#a41) (accessed  
19  
20 376 27 March 2018).  
21  
22  
23 377 15. Government of Alberta. Interactive Health Data Application. STI-Age-Sex Specific  
24  
25 378 Incidence Rate.  
26  
27 379 [http://www.ahw.gov.ab.ca/IHDA\\_Retrieval/redirectToURL.do?cat=81&subCat=466](http://www.ahw.gov.ab.ca/IHDA_Retrieval/redirectToURL.do?cat=81&subCat=466)  
28  
29 380 (accessed on 12 June 2018).  
30  
31  
32 381 16. Daey Ouwens IM, Koedijk FD, Fiolet AT, *et al.* Neurosyphilis in the mixed urban-rural  
33  
34 382 community of the Netherlands. *Acta neuropsychiatrica* 2014;26:186-192.  
35  
36 383 17. Government of Alberta Public Health Notifiable Disease Management Guidelines:  
37  
38 384 Syphilis July 2012. [https://open.alberta.ca/dataset/e234483d-fc2d-4bbf-a248-](https://open.alberta.ca/dataset/e234483d-fc2d-4bbf-a248-e0442808187e/resource/244eacc-c0ac-4933-9347-a908cbbc45f0/download/Guidelines-Syphilis-2012.pdf)  
39  
40 385 [e0442808187e/resource/244eacc-c0ac-4933-9347-](https://open.alberta.ca/dataset/e234483d-fc2d-4bbf-a248-e0442808187e/resource/244eacc-c0ac-4933-9347-a908cbbc45f0/download/Guidelines-Syphilis-2012.pdf)  
41  
42 386 [a908cbbc45f0/download/Guidelines-Syphilis-2012.pdf](https://open.alberta.ca/dataset/e234483d-fc2d-4bbf-a248-e0442808187e/resource/244eacc-c0ac-4933-9347-a908cbbc45f0/download/Guidelines-Syphilis-2012.pdf) (accessed 26 April 2018).  
43  
44  
45 387 18. Government of Alberta. Interactive Health Data Application. Population Estimates.  
46  
47 388 [http://www.ahw.gov.ab.ca/IHDA\\_Retrieval/redirectToURL.do?cat=5&subCat=63](http://www.ahw.gov.ab.ca/IHDA_Retrieval/redirectToURL.do?cat=5&subCat=63)  
48  
49 389 (accessed on 1 June 2018).  
50  
51  
52  
53  
54  
55  
56  
57  
58  
59  
60

- 1  
2  
3 390 19. Government of Alberta Public Health Notifiable Disease Management Guidelines:  
4  
5  
6 391 Human Immunodeficiency Virus (HIV), January 2011.  
7  
8 392 <https://open.alberta.ca/publications/human-immunodeficiency-virus-hiv> (accessed 24  
9  
10 393 July 2018).
- 11  
12  
13 394 20. Romanowski B, Sutherland R, Love EJ, Mooney D. Epidemiology of an outbreak of  
14  
15  
16 395 infectious syphilis in Alberta. *Int J STD AIDS* 1991;2:424-7.
- 17  
18 396 21. Nakashima AK, Rolfs RT, Flock ML, *et al.* Epidemiology of syphilis in the United States,  
19  
20  
21 397 1941--1993. *Sex Transm Dis* 1996;23:16-23.
- 22  
23 398 22. Grassly NC, Fraser C, Garnett GP. Host immunity and synchronized epidemics of syphilis  
24  
25  
26 399 across the United States. *Nature* 2005; 433: 417–21.
- 27  
28 400 23. Grenfell B, Bjornstad O. Epidemic cycling and immunity. *Nature* 2005;433:366-7.
- 29  
30  
31 401 24. Alberta Health and Wellness. Sexually Transmitted Infections Surveillance Report:  
32  
33 402 Alberta – 1998 to 2002. [https://open.alberta.ca/dataset/262e0d89-1fbe-4120-b521-](https://open.alberta.ca/dataset/262e0d89-1fbe-4120-b521-d0b586caea0b/resource/e2fd112f-7d7d-4f2e-accb-8afd38af4dba/download/sti-surveillance-2002.pdf)  
34  
35 403 [d0b586caea0b/resource/e2fd112f-7d7d-4f2e-accb-8afd38af4dba/download/sti-](https://open.alberta.ca/dataset/262e0d89-1fbe-4120-b521-d0b586caea0b/resource/e2fd112f-7d7d-4f2e-accb-8afd38af4dba/download/sti-surveillance-2002.pdf)  
36  
37 404 [surveillance-2002.pdf](https://open.alberta.ca/dataset/262e0d89-1fbe-4120-b521-d0b586caea0b/resource/e2fd112f-7d7d-4f2e-accb-8afd38af4dba/download/sti-surveillance-2002.pdf). Accessed March 13, 2019.
- 38  
39  
40  
41 405 25. Patton ME, Su JR, Nelson R, Weinstock H; Centers for Disease Control and Prevention  
42  
43  
44 406 (CDC). Primary and secondary syphilis--United States, 2005-2013.  
45  
46 407 *MMWR Morb Mortal Wkly Rep* 2014;63:402-6.
- 47  
48 408 26. Gratrix J, Plitt S, Lee BE, *et al.* Impact of Reverse Sequence Syphilis Screening on New  
49  
50  
51 409 Diagnoses of Late Latent Syphilis in Edmonton, Canada. *Sex Transm Dis* 2012;39:528-30.
- 52  
53 410 27. Lester RT, Morshed M, Gilbert M, Hottes T. Syphilis and neurosyphilis increase to  
54  
55  
56 411 historic levels in BC. *BC Med* 2013; 55: 204-5.
- 57  
58  
59  
60

- 1  
2  
3 412 28. Tang W, Huang S, Chen L, *et al*. Late Neurosyphilis and Tertiary Syphilis in Guangdong  
4  
5 Province, China: Results from a Cross-sectional Study. *Sci Rep* 2017;7:45339.  
6 413  
7  
8 414 29. Public Health Agency of Canada. Canadian Guidelines on Sexually Transmitted  
9  
10 Infections-Management and treatment of specific infections-Syphilis.  
11 415  
12 [https://www.canada.ca/en/public-health/services/infectious-diseases/sexual-health-  
18 418 sexually-transmitted-infections/canadian-guidelines/sexually-transmitted-  
19 infections/canadian-guidelines-sexually-transmitted-infections-27.html](https://www.canada.ca/en/public-health/services/infectious-diseases/sexual-health-<br/>13 416 sexually-transmitted-infections/canadian-guidelines/sexually-transmitted-<br/>14<br/>15 417 sexually-transmitted-infections/canadian-guidelines/sexually-transmitted-<br/>16<br/>17 infections/canadian-guidelines-sexually-transmitted-infections-27.html) (accessed 11  
20 419 July 2018).  
21  
22  
23 420 30. Centers for Disease Control and Prevention, Health Resources and Services  
24  
25 421 Administration, National Institutes of Health, American Academy of HIV Medicine,  
26  
27 422 Association of Nurses in AIDS Care, International Association of Providers of AIDS Care,  
28  
29 423 the National Minority AIDS Council, and Urban Coalition for HIV/AIDS Prevention  
30  
31 Services. Recommendations for HIV Prevention with Adults and Adolescents with HIV in  
32 424 the United States, 2014. <http://stacks.cdc.gov/view/cdc/26062> (accessed March 10,  
33  
34 425 2019).  
35  
36 426  
37  
38  
39 427 31. Oliver SE, Aubin M, Atwell L, *et al*. Ocular Syphilis - Eight Jurisdictions, United States,  
40  
41 428 2014-2015. *MMWR Morb Mortal Wkly Rep* 2016;65:1185-1188.  
42  
43  
44 429 32. Dabis R, Radcliffe K. Is it useful to perform chest x-ray in asymptomatic patients with  
45  
46 430 late latent syphilis. *Int J STD AIDS* 2011;22:105-6.  
47  
48  
49 431  
50  
51 432  
52  
53  
54 433  
55  
56  
57  
58  
59  
60

1  
2  
3 434 Figure 1. Rate per 100,000 Population of Syphilis by Type and Diagnosis Year (Alberta, Canada,  
4  
5  
6 435 1975-2016)

7  
8 436  
9

10 437 Figure 2. Number and Notification Rate of Early and Late Neurosyphilis by Year (Alberta, 1975-  
11  
12  
13 438 2016)

14  
15 439

16  
17  
18 440 Figure 3: Algorithm of diagnosis of neurosyphilis among HIV-positive and HIV-negative cases  
19  
20 441 (Alberta, 1975-March 2017)

21  
22 442  
23  
24  
25 443  
26  
27 444  
28  
29  
30  
31  
32  
33  
34  
35  
36  
37  
38  
39  
40  
41  
42  
43  
44  
45  
46  
47  
48  
49  
50  
51  
52  
53  
54  
55  
56  
57  
58  
59  
60

1  
2  
3  
4  
5  
6  
7  
8  
9  
10  
11  
12  
13  
14  
15  
16  
17  
18  
19  
20  
21  
22  
23  
24  
25  
26  
27  
28  
29  
30  
31  
32  
33  
34  
35  
36  
37  
38  
39  
40  
41  
42  
43  
44  
45  
46  
47  
48  
49  
50  
51  
52  
53  
54  
55  
56  
57  
58  
59  
60

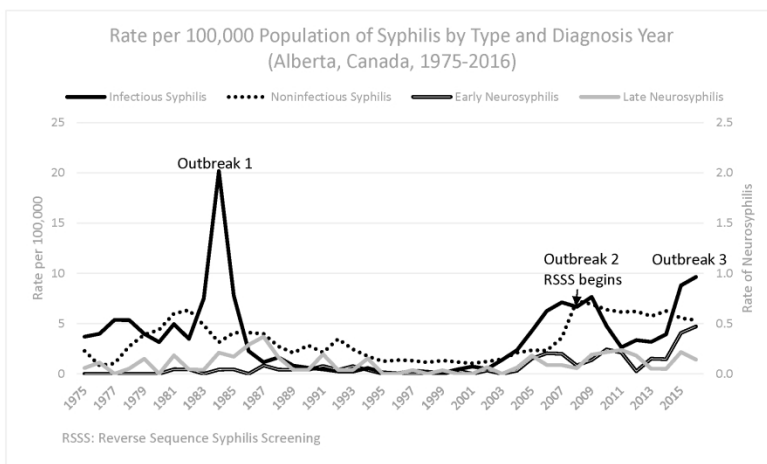

Figure 1. Rate per 100,000 Population of Syphilis by Type and Diagnosis Year (Alberta, Canada, 1975-2016)

215x279mm (300 x 300 DPI)



Figure 2. Rates of Early and Late Neurosyphilis during 2 Different Outbreak Periods with Linear Trend Line (Alberta, 1975-2016)

279x215mm (300 x 300 DPI)





Figure 3: Algorithm of diagnosis of neurosyphilis among HIV-positive and HIV-negative cases (Alberta, 1975-March 2017)

279x215mm (300 x 300 DPI)

STROBE Statement—Checklist of items that should be included in reports of *cross-sectional studies*

|                              | <b>Item No</b> | <b>Recommendation</b>                                                                                                                                                                                        | <b>Reported on page #</b> |
|------------------------------|----------------|--------------------------------------------------------------------------------------------------------------------------------------------------------------------------------------------------------------|---------------------------|
| <b>Title and abstract</b>    | 1              | (a) Indicate the study's design with a commonly used term in the title or the abstract                                                                                                                       | 1                         |
|                              |                | (b) Provide in the abstract an informative and balanced summary of what was done and what was found                                                                                                          | 2                         |
| <b>Introduction</b>          |                |                                                                                                                                                                                                              |                           |
| Background/rationale         | 2              | Explain the scientific background and rationale for the investigation being reported                                                                                                                         | 4-5                       |
| Objectives                   | 3              | State specific objectives, including any prespecified hypotheses                                                                                                                                             | 5-6                       |
| <b>Methods</b>               |                |                                                                                                                                                                                                              |                           |
| Study design                 | 4              | Present key elements of study design early in the paper                                                                                                                                                      | 6                         |
| Setting                      | 5              | Describe the setting, locations, and relevant dates, including periods of recruitment, exposure, follow-up, and data collection                                                                              | 6                         |
| Participants                 | 6              | (a) Give the eligibility criteria, and the sources and methods of selection of participants                                                                                                                  | 6                         |
| Variables                    | 7              | Clearly define all outcomes, exposures, predictors, potential confounders, and effect modifiers. Give diagnostic criteria, if applicable                                                                     | 6-7                       |
| Data sources/<br>measurement | 8*             | For each variable of interest, give sources of data and details of methods of assessment (measurement). Describe comparability of assessment methods if there is more than one group                         | 7                         |
| Bias                         | 9              | Describe any efforts to address potential sources of bias                                                                                                                                                    | 6                         |
| Study size                   | 10             | Explain how the study size was arrived at                                                                                                                                                                    | 6                         |
| Quantitative<br>variables    | 11             | Explain how quantitative variables were handled in the analyses. If applicable, describe which groupings were chosen and why                                                                                 | 7                         |
| Statistical methods          | 12             | (a) Describe all statistical methods, including those used to control for confounding                                                                                                                        | 7                         |
|                              |                | (b) Describe any methods used to examine subgroups and interactions                                                                                                                                          | N/A                       |
|                              |                | (c) Explain how missing data were addressed                                                                                                                                                                  | 7                         |
|                              |                | (d) If applicable, describe analytical methods taking account of sampling strategy                                                                                                                           | N/A                       |
|                              |                | (e) Describe any sensitivity analyses                                                                                                                                                                        | N/A                       |
| <b>Results</b>               |                |                                                                                                                                                                                                              |                           |
| Participants                 | 13*            | (a) Report numbers of individuals at each stage of study—eg numbers potentially eligible, examined for eligibility, confirmed eligible, included in the study, completing follow-up, and analysed            | 7-8                       |
|                              |                | (b) Give reasons for non-participation at each stage                                                                                                                                                         | N/A                       |
|                              |                | (c) Consider use of a flow diagram                                                                                                                                                                           | N/A                       |
| Descriptive data             | 14*            | (a) Give characteristics of study participants (eg demographic, clinical, social) and information on exposures and potential confounders                                                                     | Table 2                   |
|                              |                | (b) Indicate number of participants with missing data for each variable of interest                                                                                                                          | Table 2                   |
| Outcome data                 | 15*            | Report numbers of outcome events or summary measures                                                                                                                                                         | 8                         |
| Main results                 | 16             | (a) Give unadjusted estimates and, if applicable, confounder-adjusted estimates and their precision (eg, 95% confidence interval). Make clear which confounders were adjusted for and why they were included |                           |

|                          |    |                                                                                                                                                                            |                 |
|--------------------------|----|----------------------------------------------------------------------------------------------------------------------------------------------------------------------------|-----------------|
|                          |    | (b) Report category boundaries when continuous variables were categorized                                                                                                  | Table 2         |
|                          |    | (c) If relevant, consider translating estimates of relative risk into absolute risk for a meaningful time period                                                           | N/A             |
| Other analyses           | 17 | Report other analyses done—eg analyses of subgroups and interactions, and sensitivity analyses                                                                             | Figure 2<br>8-9 |
| <b>Discussion</b>        |    |                                                                                                                                                                            |                 |
| Key results              | 18 | Summarise key results with reference to study objectives                                                                                                                   | 11-12           |
| Limitations              | 19 | Discuss limitations of the study, taking into account sources of potential bias or imprecision. Discuss both direction and magnitude of any potential bias                 | 14              |
| Interpretation           | 20 | Give a cautious overall interpretation of results considering objectives, limitations, multiplicity of analyses, results from similar studies, and other relevant evidence | 15              |
| Generalisability         | 21 | Discuss the generalisability (external validity) of the study results                                                                                                      | 15              |
| <b>Other information</b> |    |                                                                                                                                                                            |                 |
| Funding                  | 22 | Give the source of funding and the role of the funders for the present study and, if applicable, for the original study on which the present article is based              | 3               |

\*Give information separately for exposed and unexposed groups.

**Note:** An Explanation and Elaboration article discusses each checklist item and gives methodological background and published examples of transparent reporting. The STROBE checklist is best used in conjunction with this article (freely available on the Web sites of PLoS Medicine at <http://www.plosmedicine.org/>, Annals of Internal Medicine at <http://www.annals.org/>, and Epidemiology at <http://www.epidem.com/>). Information on the STROBE Initiative is available at [www.strobe-statement.org](http://www.strobe-statement.org).
